# Supplementary material for: New Carbonic Anhydrase-II Inhibitors from Marine Macro Brown Alga Dictyopteris hoytii Supported by In Silico Studies
Source: MDPI journal article supplement (doi:10.3390/molecules26237074), 2021-11-23
Supplement: s1 [file s1]

Supporting information

# New Carbonic Anhydrase-II Inhibitors from Marine Macro Brown Alga *Dictyopteris hoytii* Supported by In Silico Studies

Kashif Rafiq <sup>1,†</sup>, Ajmal Khan <sup>1,†</sup>, Najeeb Ur Rehman <sup>1,\*</sup>, Sobia Ahsan Halim <sup>1</sup>, Majid Khan <sup>1,2</sup>, Liaqat Ali <sup>1,3</sup>, Abdullah Hilal Al-Balushi <sup>4</sup>, Haitham Khamis Al-Busaidi <sup>4</sup> and Ahmed Al-Harrasi <sup>1,\*</sup>

<sup>1</sup> Natural & Medical Sciences Research Center, University of Nizwa, P.O. Box 33, Postal Code 616, Birkat Al Mauz, Nizwa, Oman; kashifrafiq609@gmail.com (K.R.); ajmalkhan@unizwa.edu.om (A.K.); sobia\_halim@unizwa.edu.om (S.A.H.); majidk166@yahoo.com (M.K.); malikhejric@gmail.com (L.A.)

<sup>2</sup> H. E. J. Research Institute of Chemistry, International Center for Chemical and Biological Sciences, University of Karachi, Karachi 75270, Pakistan

<sup>3</sup> Department of Chemistry, University of Mianwali, Mianwali 42200, Pakistan

<sup>4</sup> Oman Animal and Plant Genetic Resources Center, P.O. Box 92, 123 Muscat, Oman; abdullah.albalushi@oapgrc.gov.om (A.H.A.-B.); Haihtam.AlBusaidi@oapgrc.gov.om (H.K.A.-B.)

\* Correspondence: najeeb@unizwa.edu.om (N.U.R.); aharrasi@unizwa.edu.om (A.A.-H.); Tel.: +968-25446328 (A.A.-H.); Fax: +968-2544-6612 (A.A.-H.)

† These authors contributed equally to this work.

**Figure S1:**  $^1\text{H}$ ,  $^{13}\text{C}$  NMR, and HR-ESI-MS of the compounds 1-12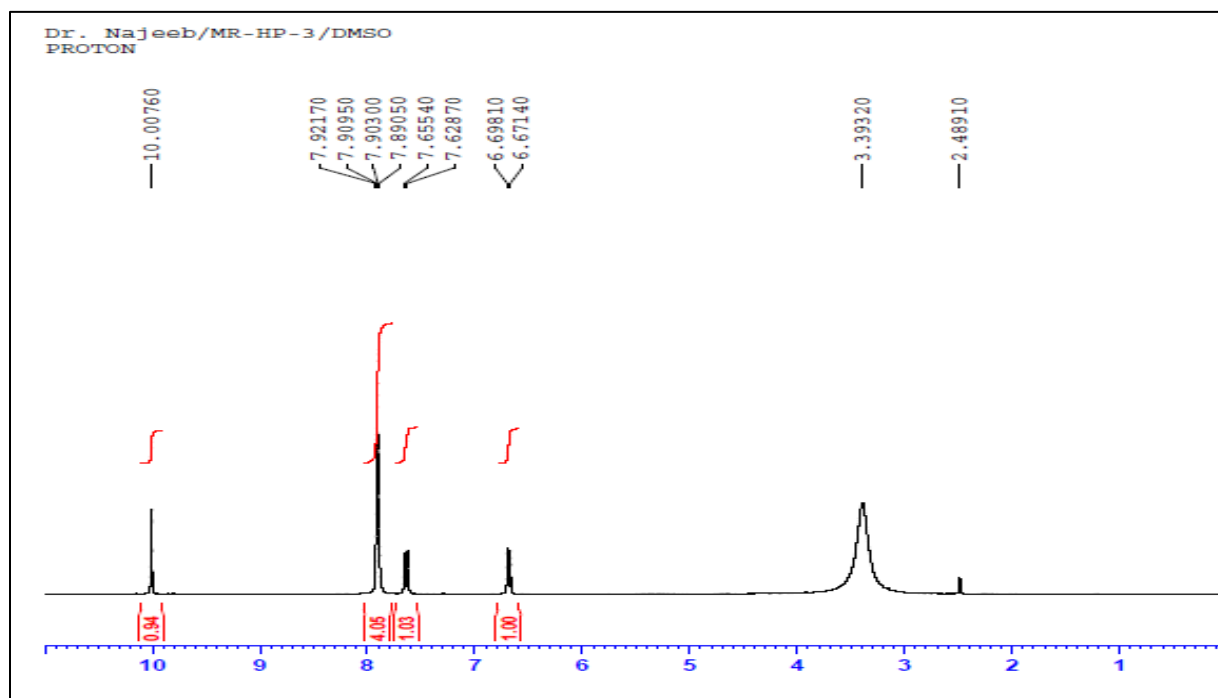 $^1\text{H}$  NMR (600 MHz) of compound 1 DMSO-*d*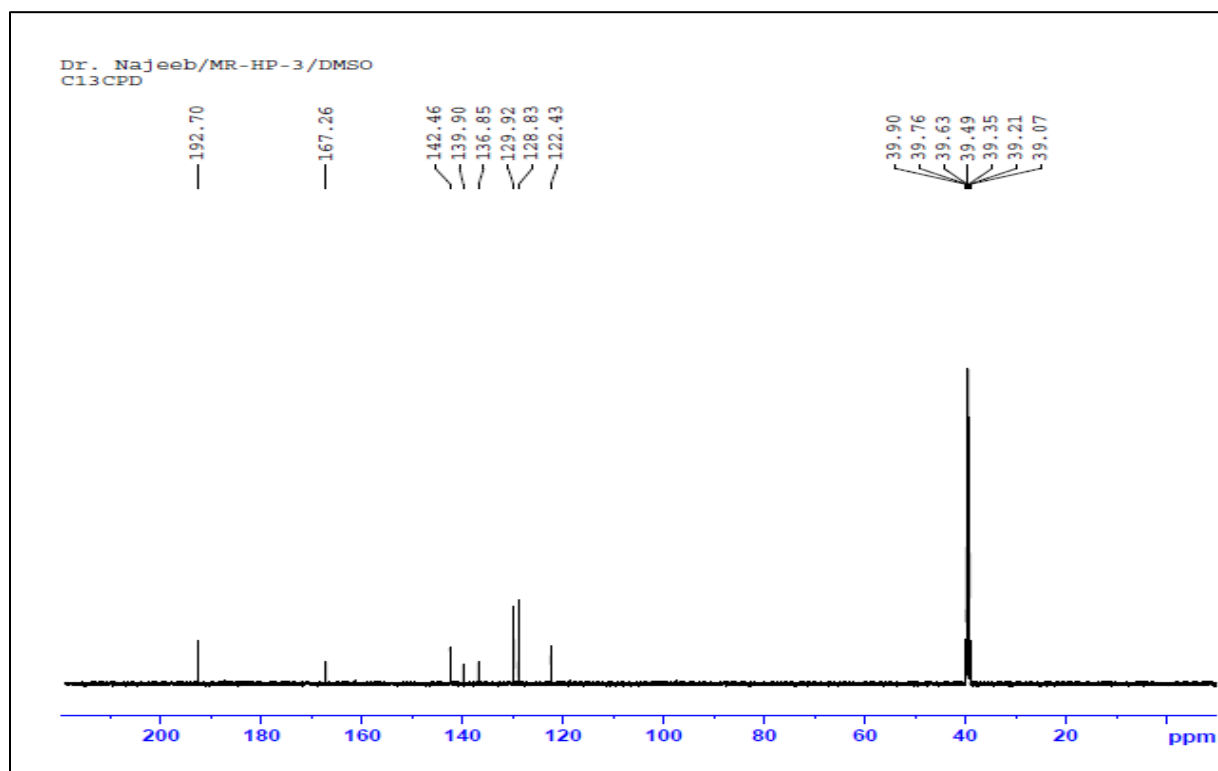 $^{13}\text{C}$  NMR (125 MHz) of compound 1 in DMSO-*d*

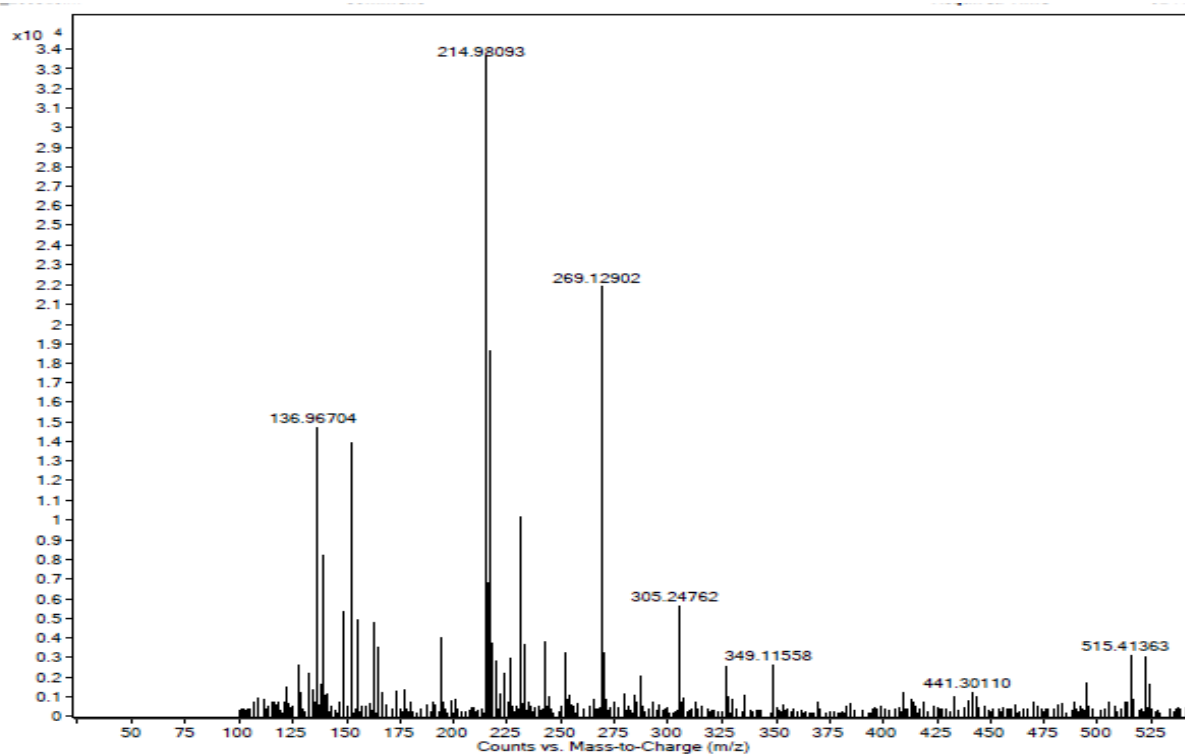

HR-ESI-MS (positive) of compound 1

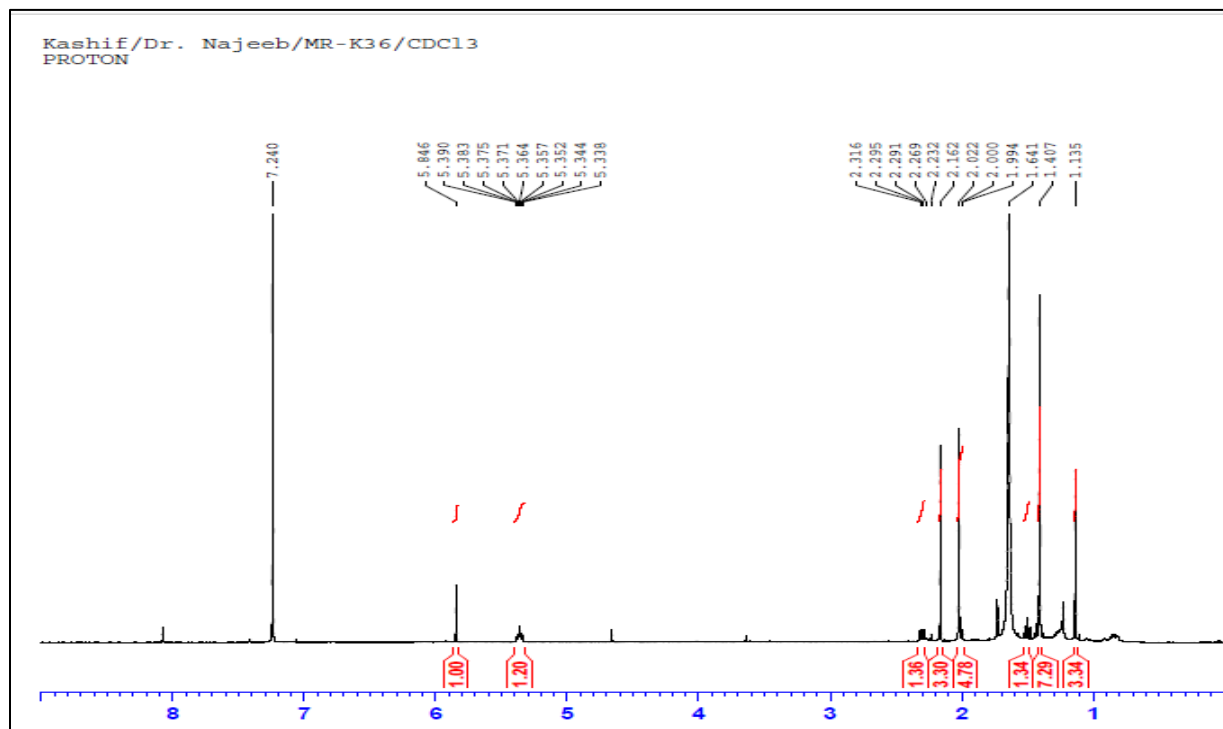<sup>1</sup>H NMR (600 MHz) of compound 2 in CDCl<sub>3</sub>

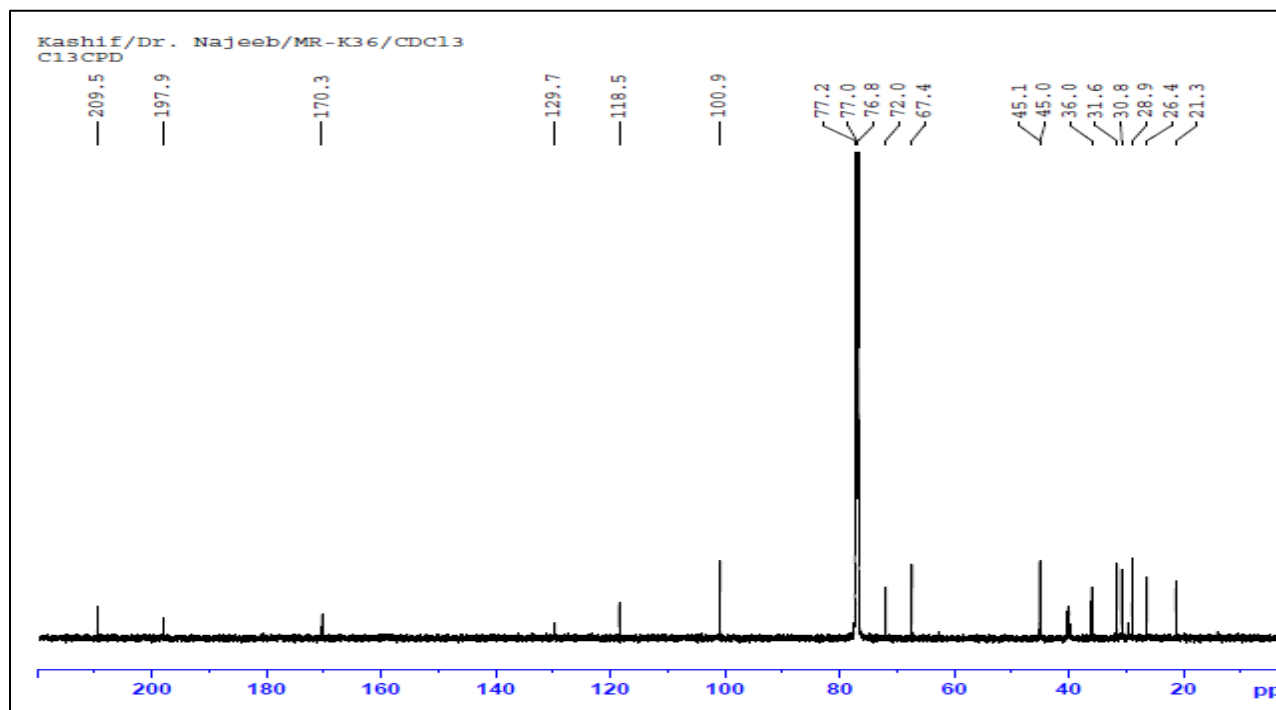

<sup>13</sup>C NMR (125 MHz) of compound **2** in CDCl<sub>3</sub>

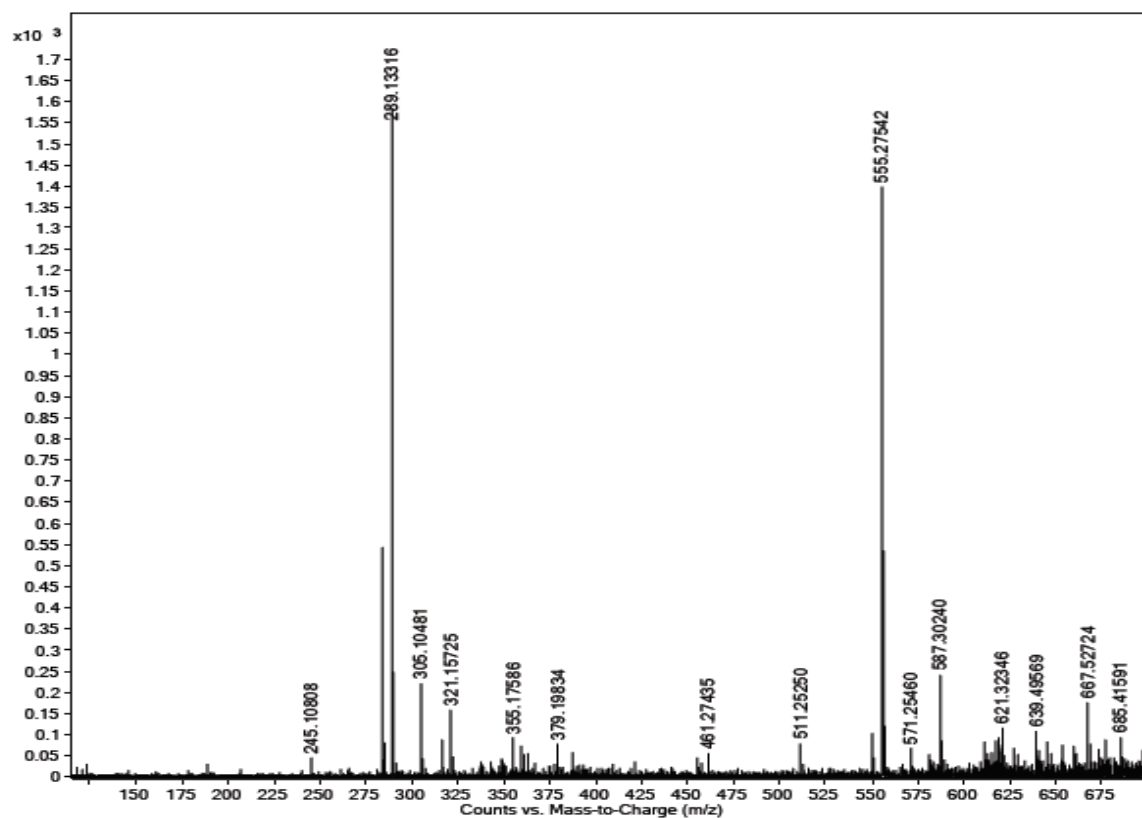

## HR-ESI-MS (positive) of compound 2

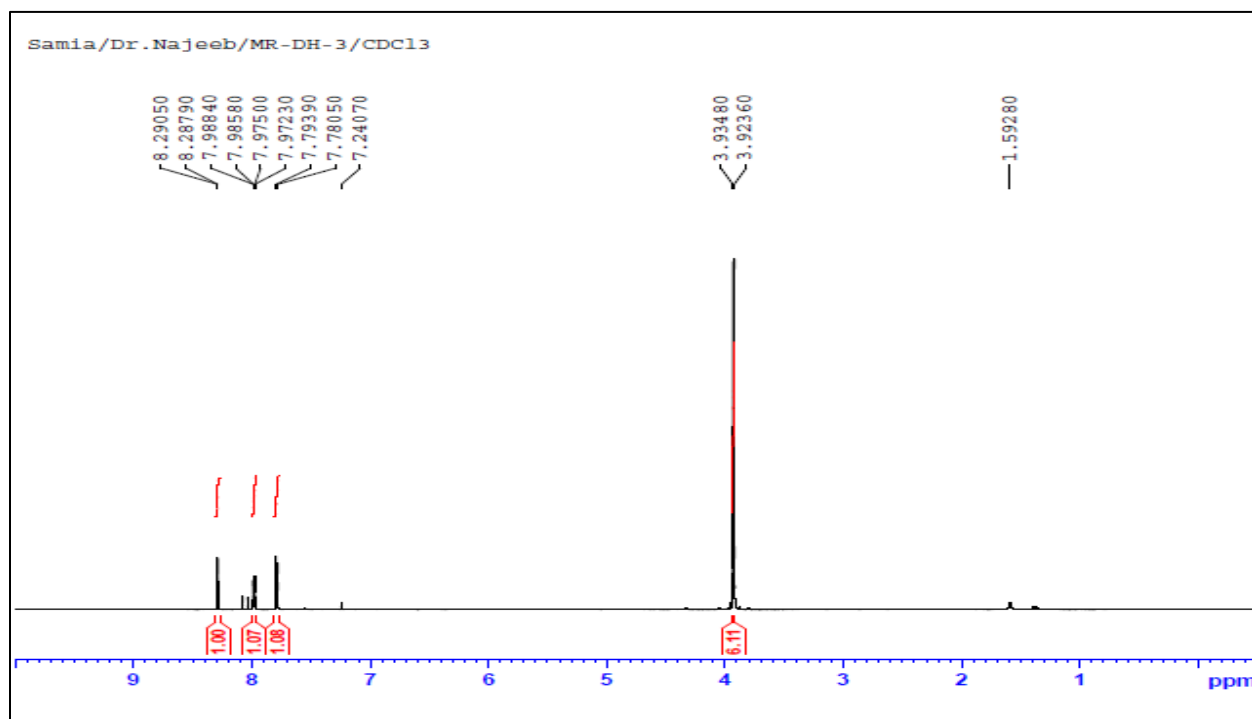<sup>13</sup>C NMR (600 MHz) of compound 3 in CDCl<sub>3</sub>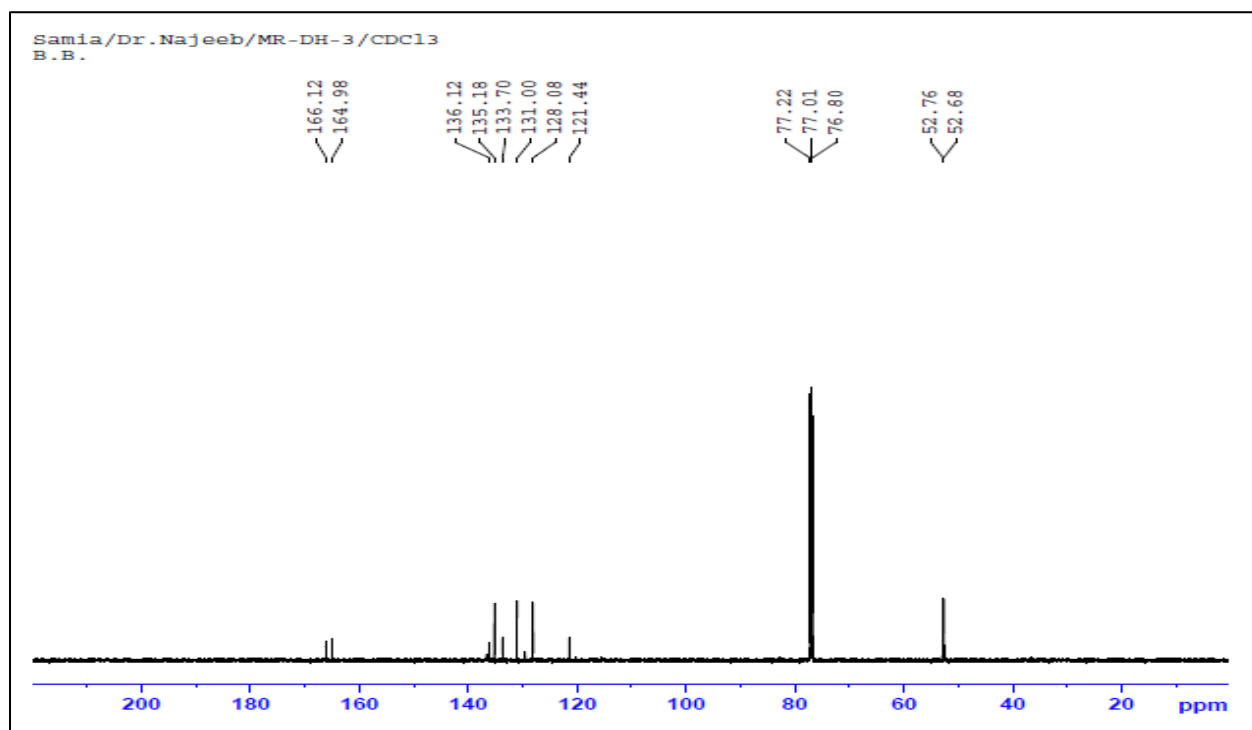

$^{13}\text{C}$  NMR (125 MHz) of compound **3** in  $\text{CDCl}_3$

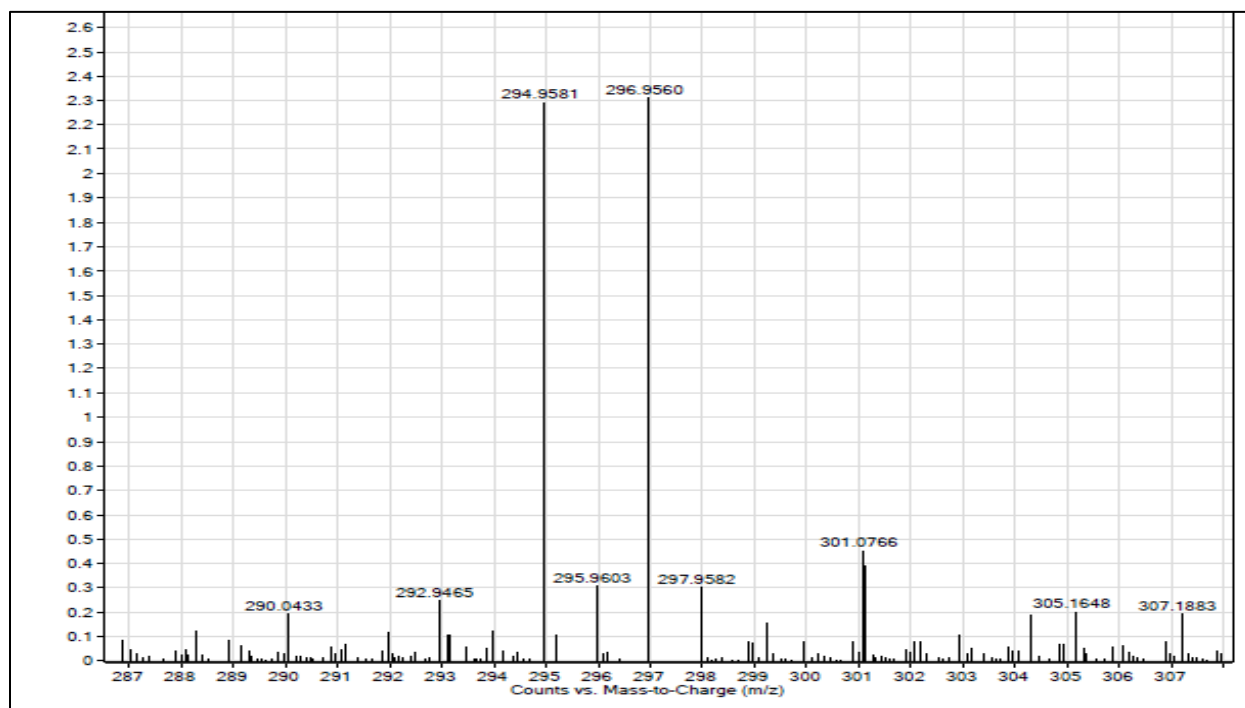

HR-ESI-MS (positive) of compound **3**

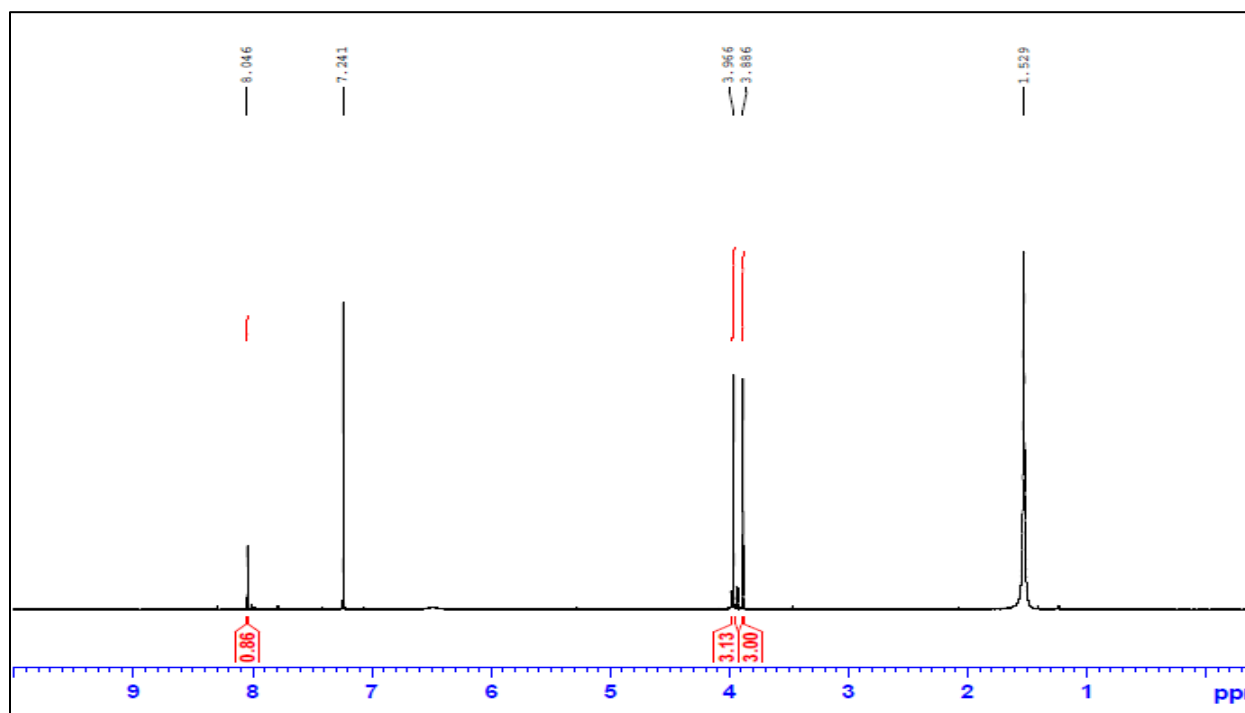

$^1\text{H}$  NMR (600 MHz) of compound **4** in  $\text{CDCl}_3$

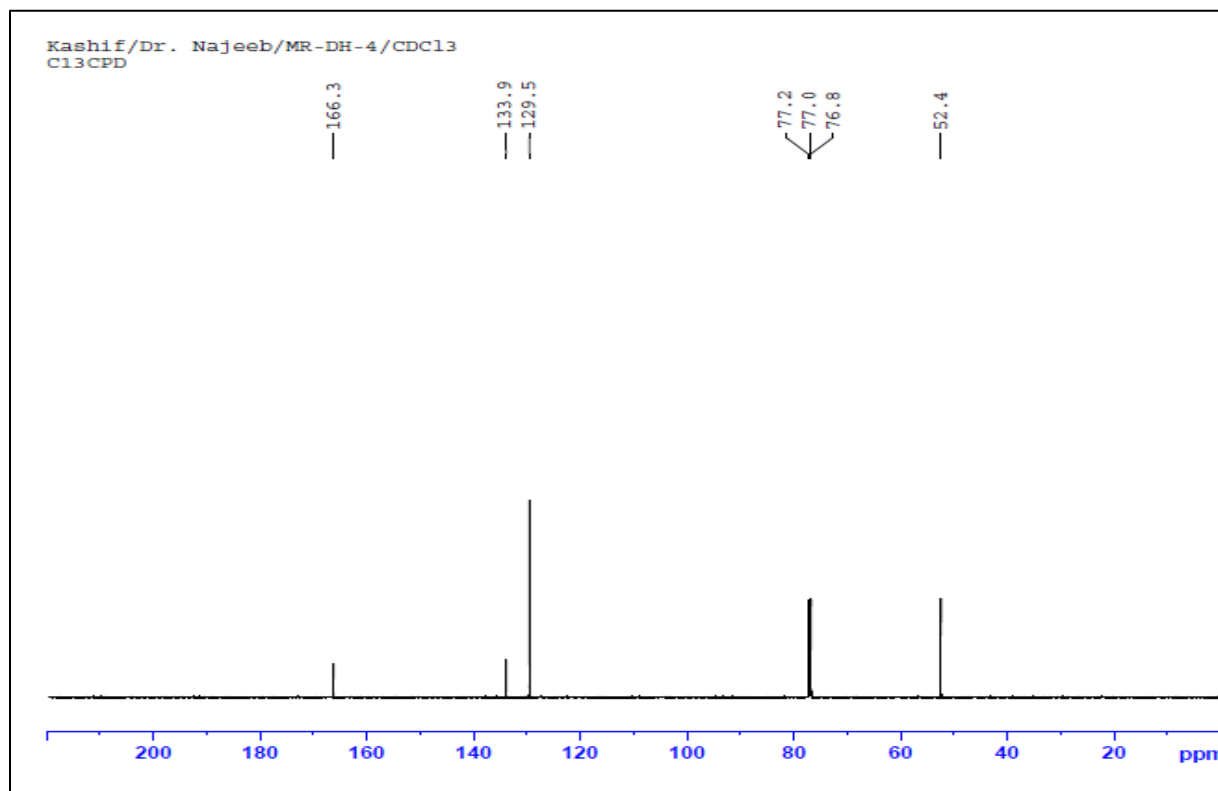

<sup>13</sup>C NMR (125 MHz) of compound **4** in CDCl<sub>3</sub>

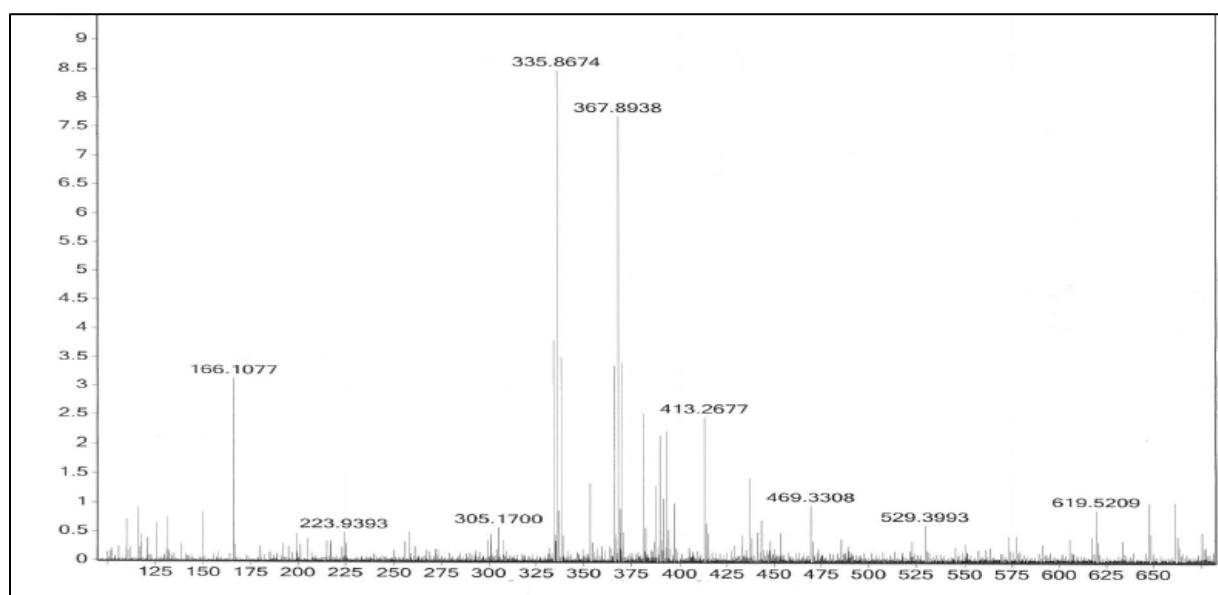

HR-ESI-MS (positive) of compound **4**

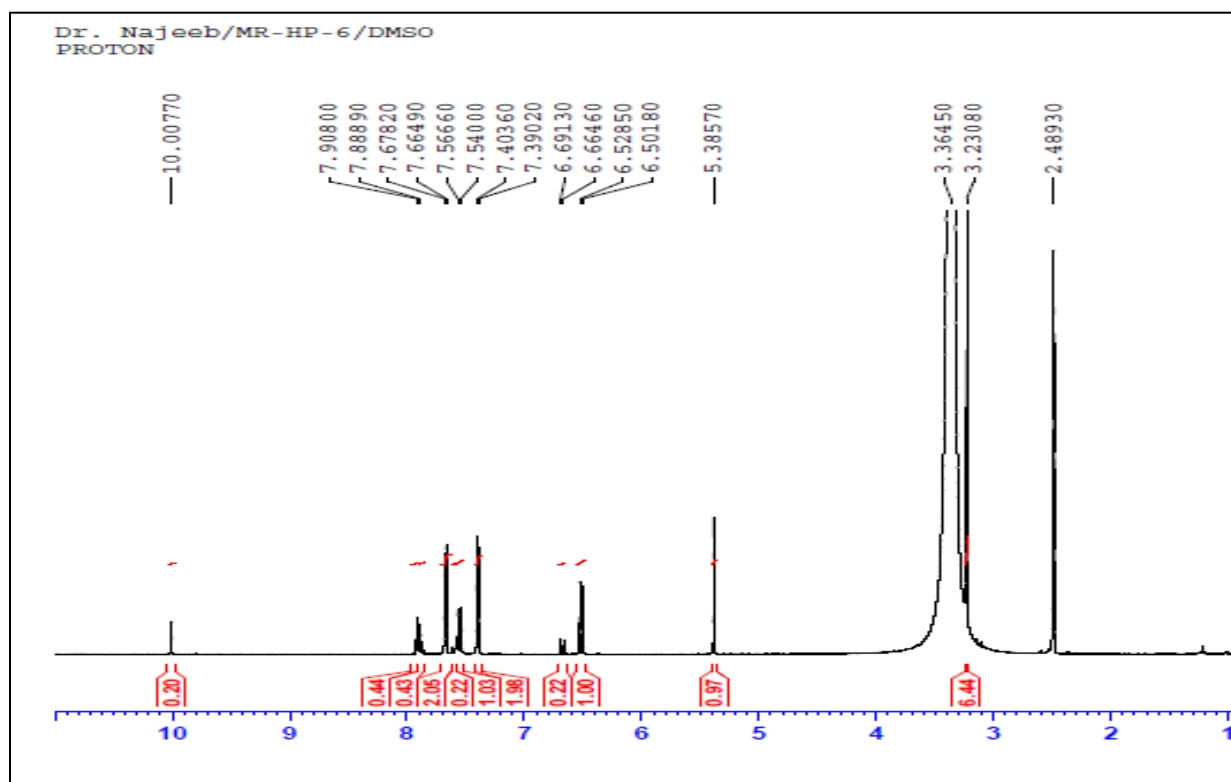

$^1\text{H}$  NMR (600 MHz) of compound 5 in DMSO-*d*

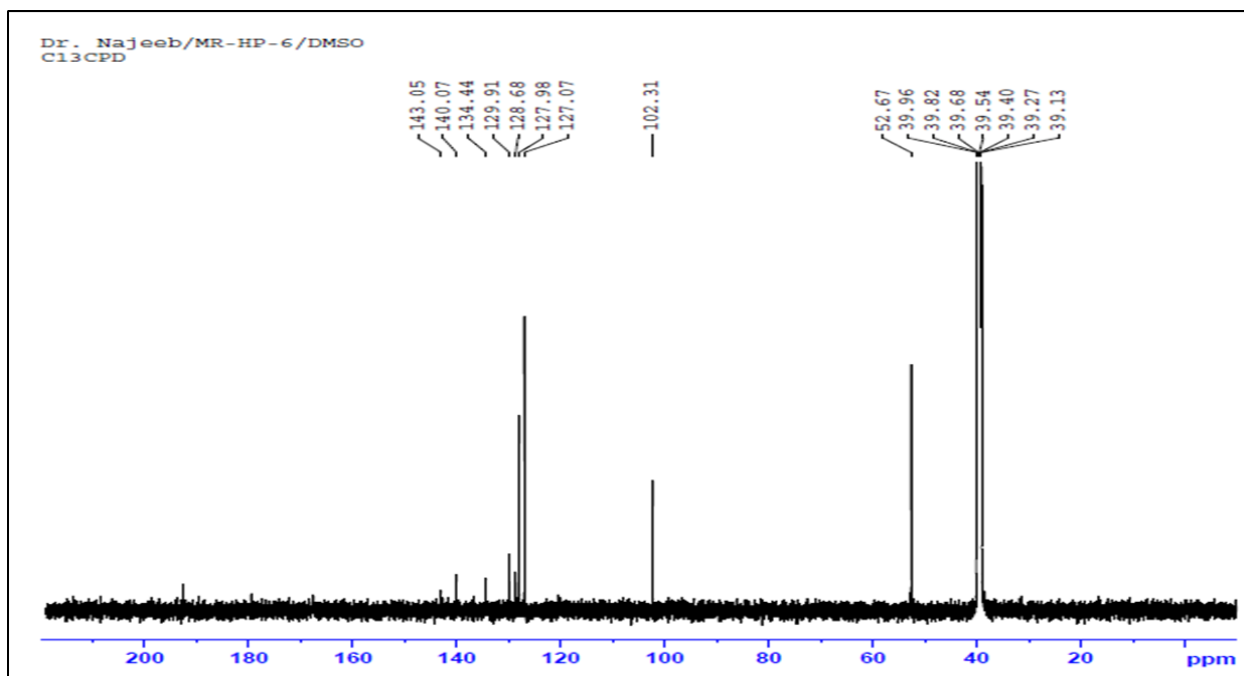

$^{13}\text{C}$  NMR (125 MHz) of compound 5 in DMSO-*d*



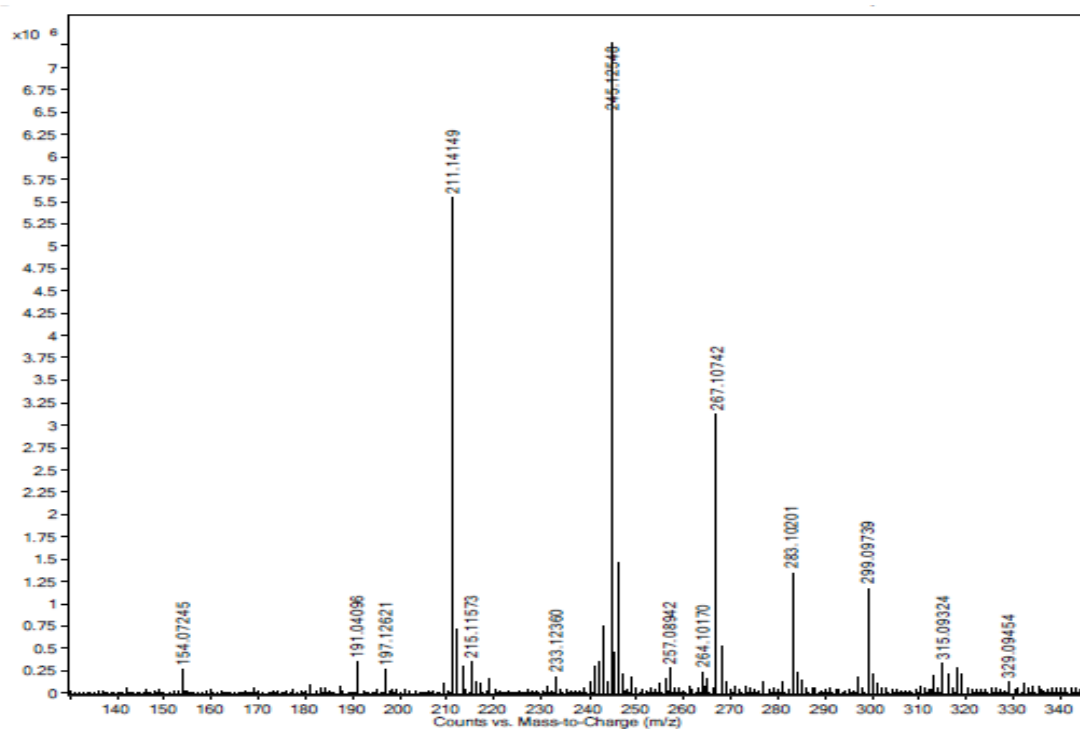

HR-ESI-MS (positive) of compound 5

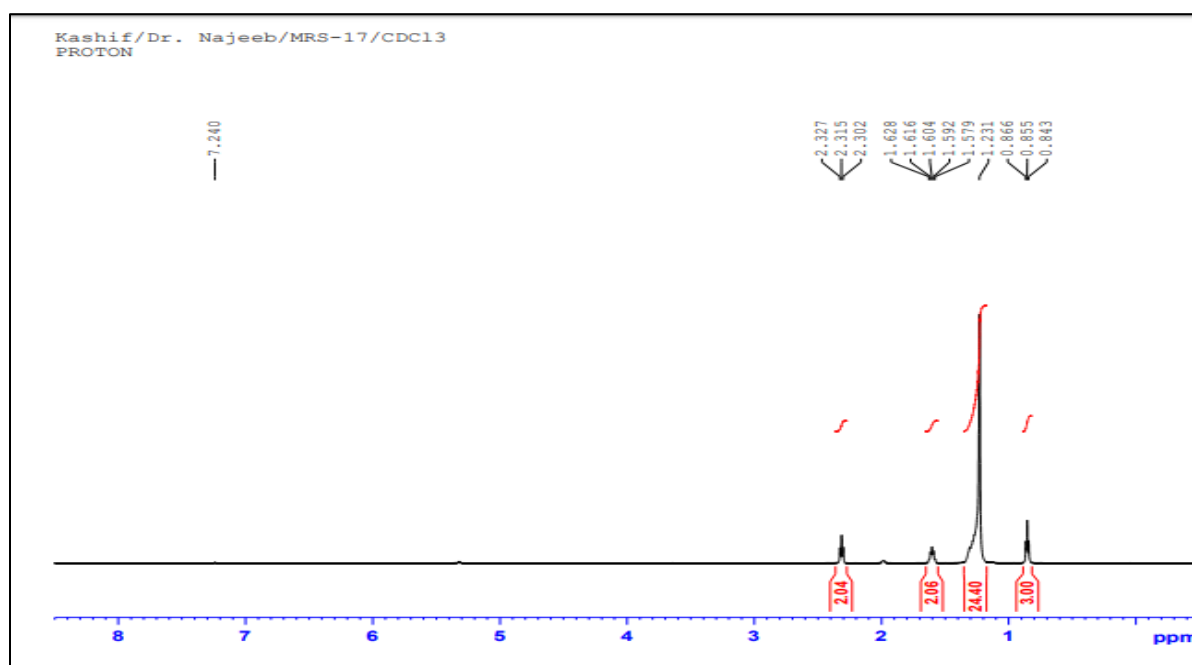 $^1\text{H}$  NMR (600 MHz) of compound 6 in  $\text{CDCl}_3$

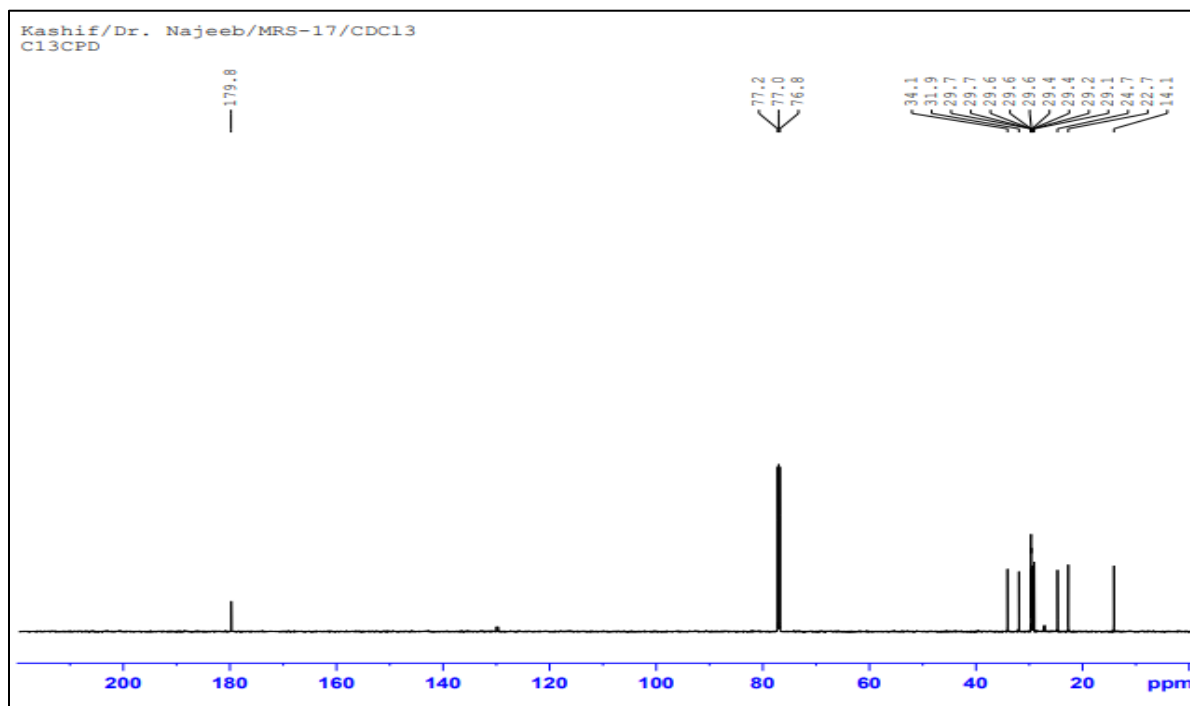

$^{13}\text{C}$  NMR (125 MHz) of compound **6** in  $\text{CDCl}_3$

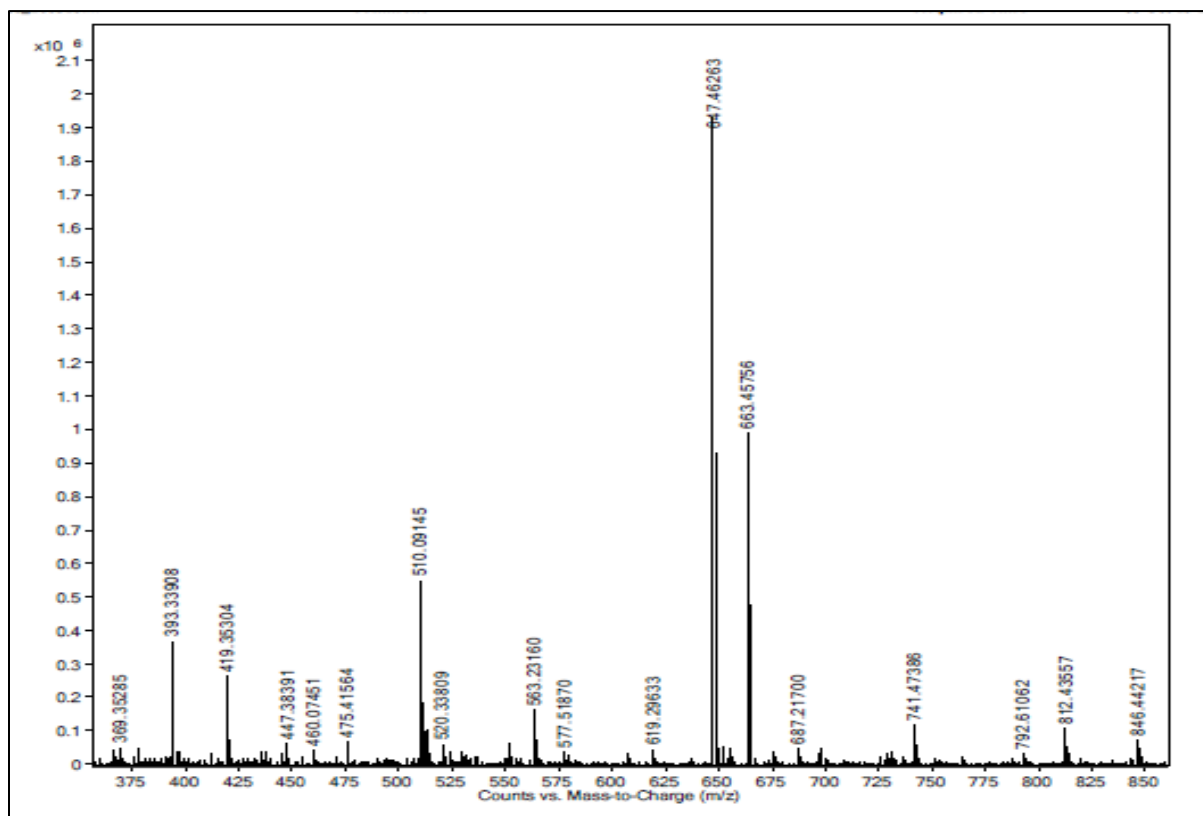

## HR-ESI-MS (positive) of compound 6

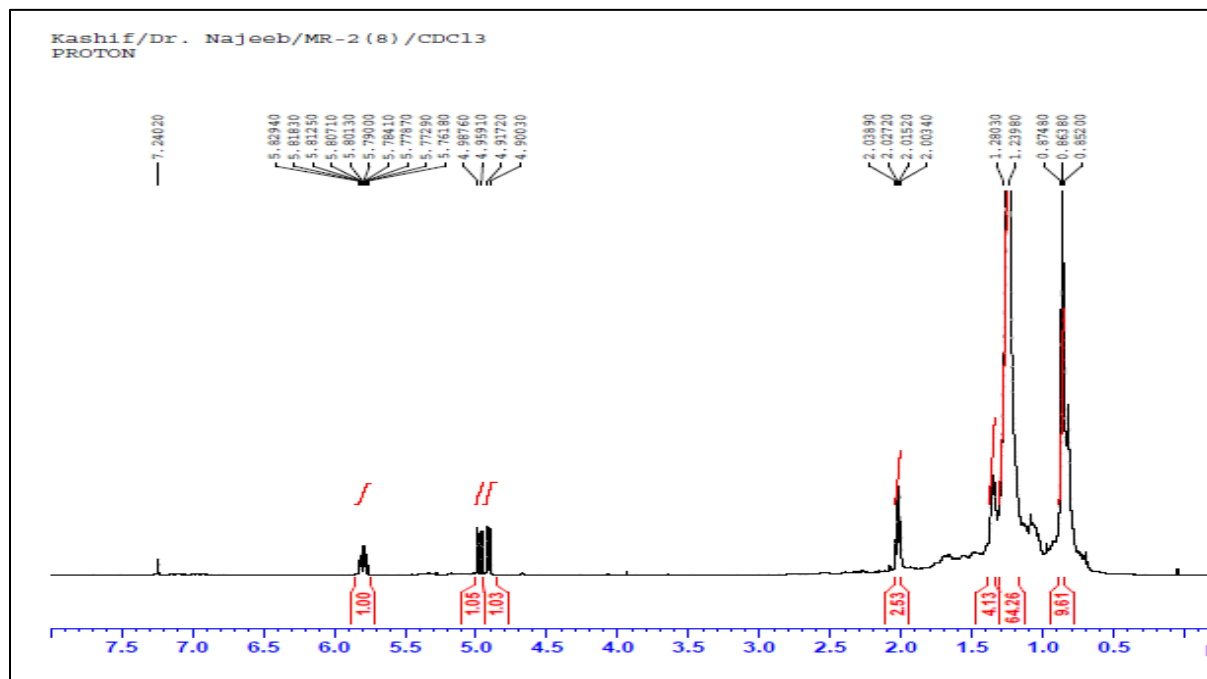<sup>1</sup>H NMR (600 MHz) of compound 7 in CDCl<sub>3</sub>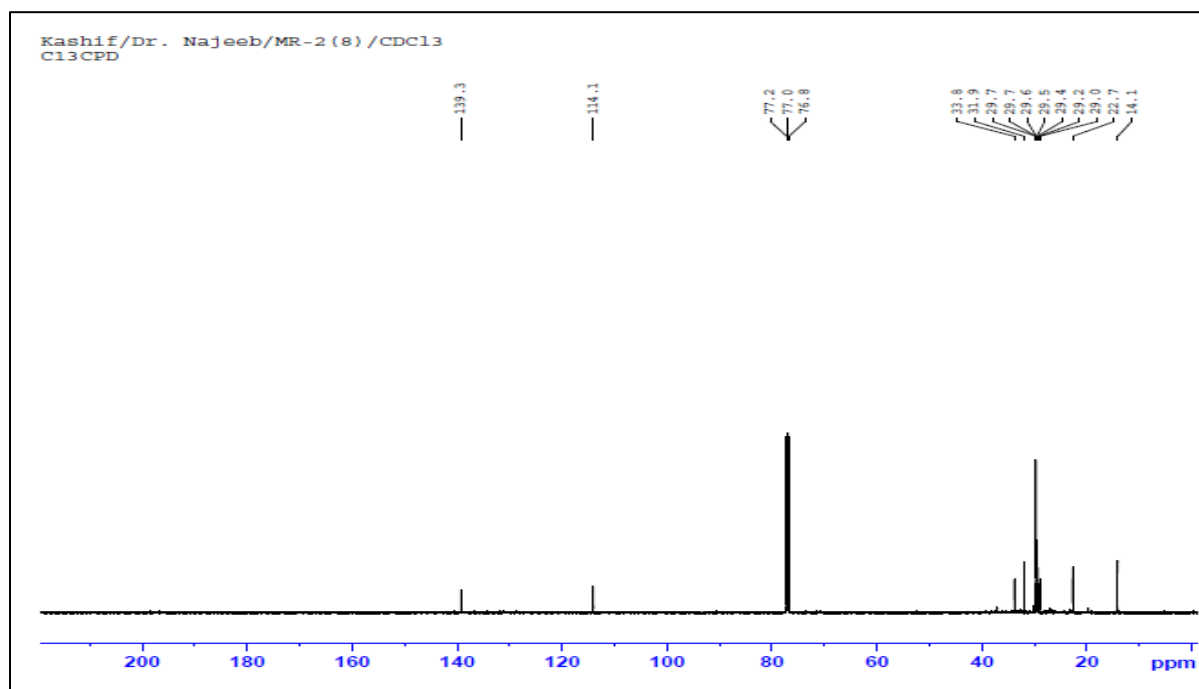<sup>13</sup>C NMR (125 MHz) of compound 7 in CDCl<sub>3</sub>

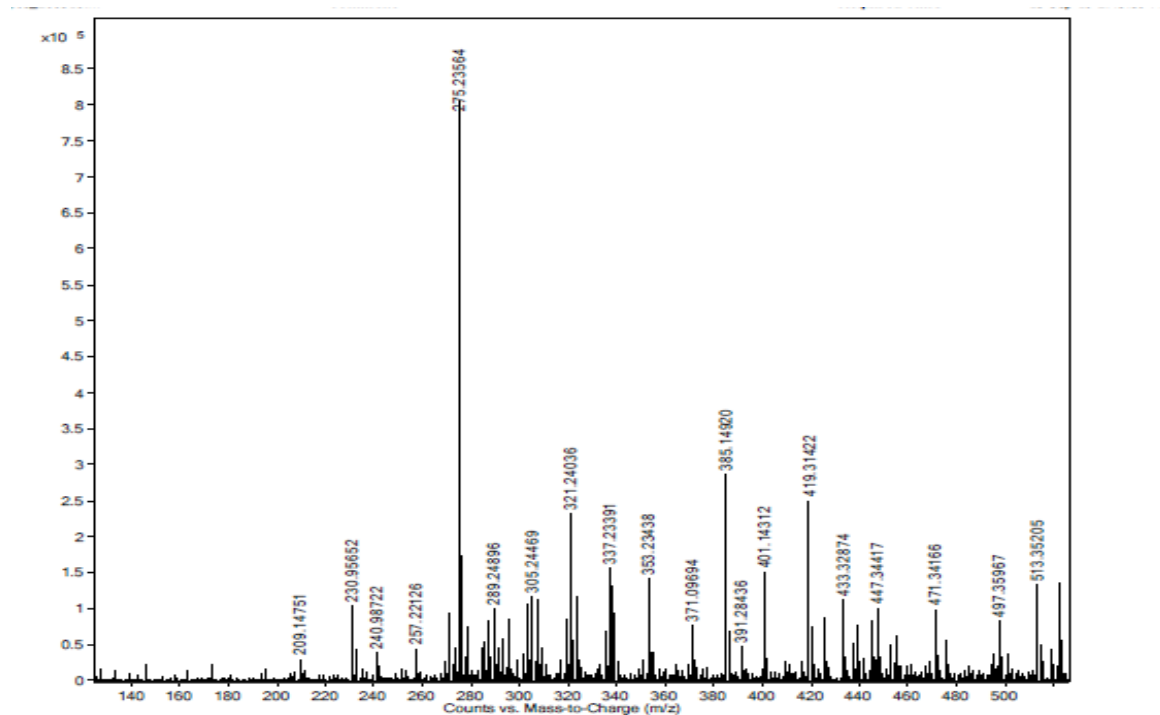

HR-ESI-MS (positive) of compound 7

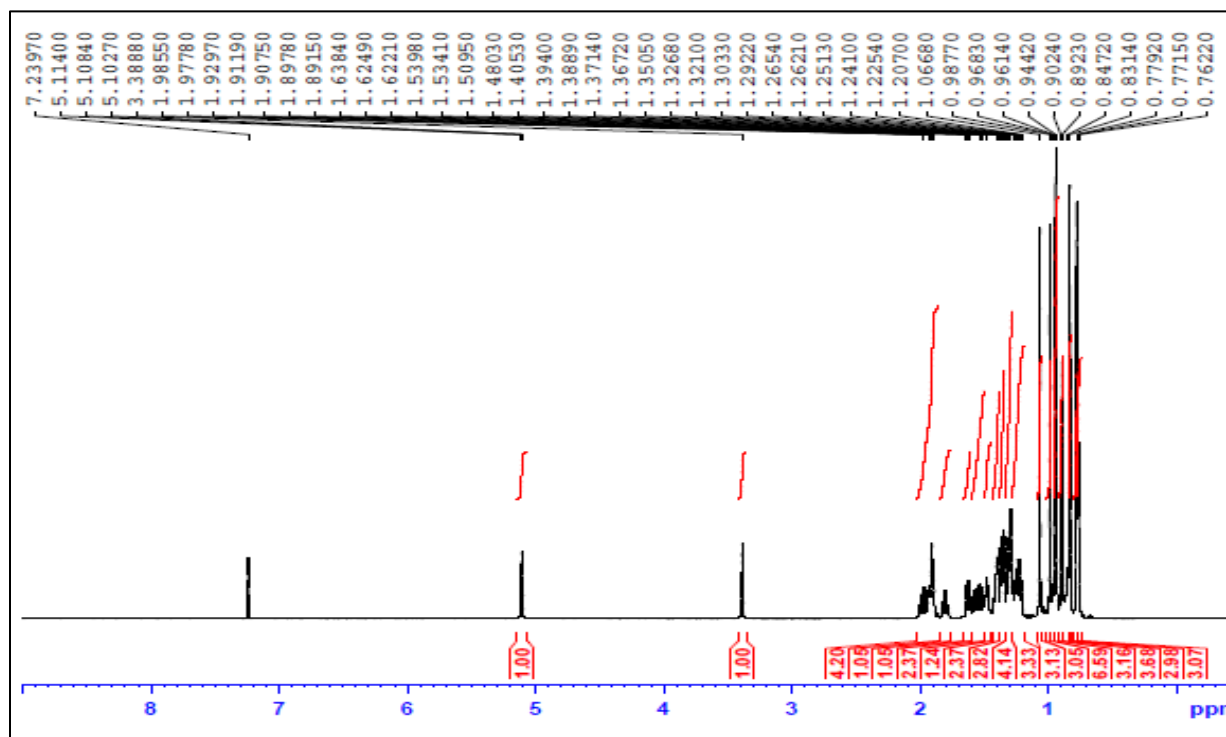

<sup>1</sup>H NMR (600 MHz) of compound 8 in CDCl<sub>3</sub>

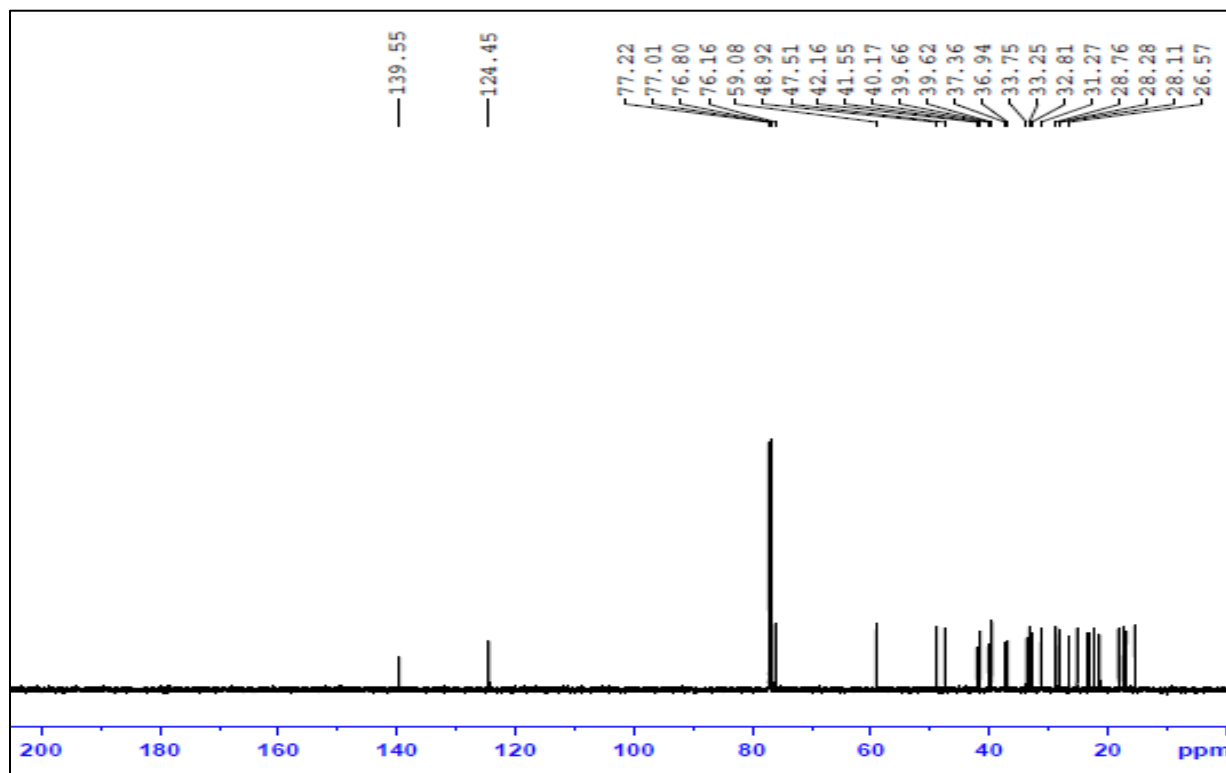

<sup>13</sup>C NMR (125 MHz) of compound 8 in CDCl<sub>3</sub>

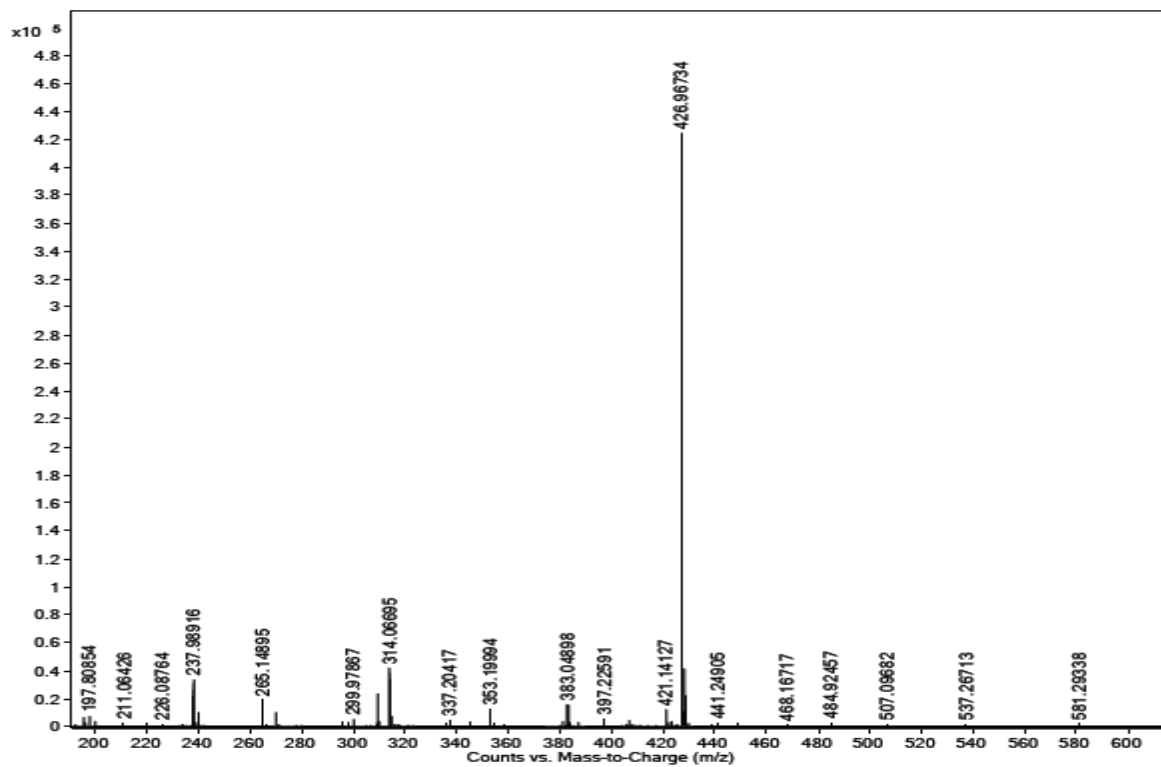

## HR-ESI-MS (positive) of compound 8

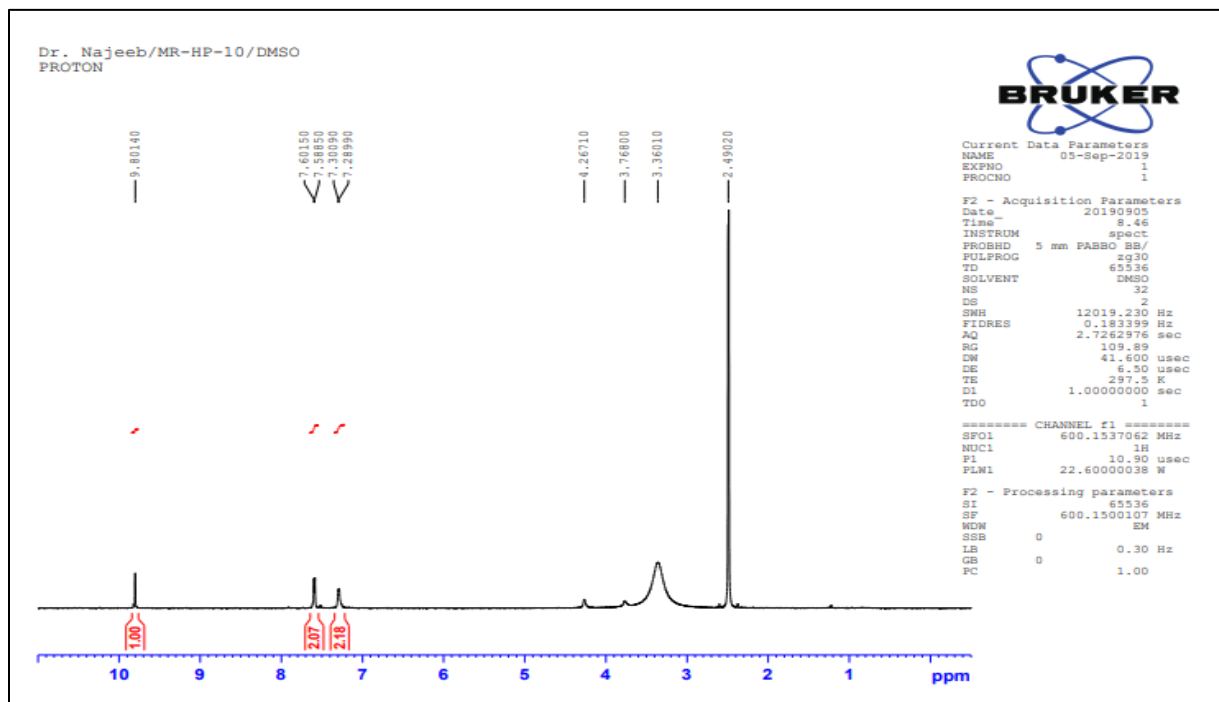 $^1\text{H}$  NMR (600 MHz) of compound 9 in DMSO-*d*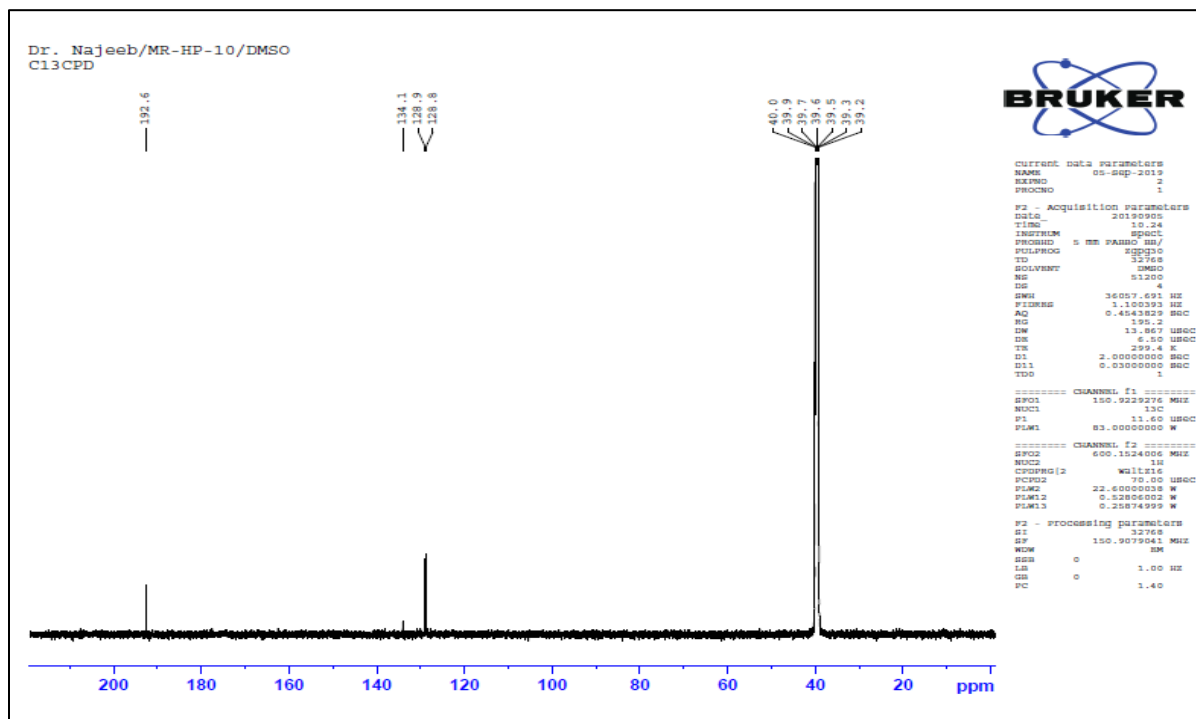 $^{13}\text{C}$  NMR (125 MHz) of compound 9 in DMSO-*d*

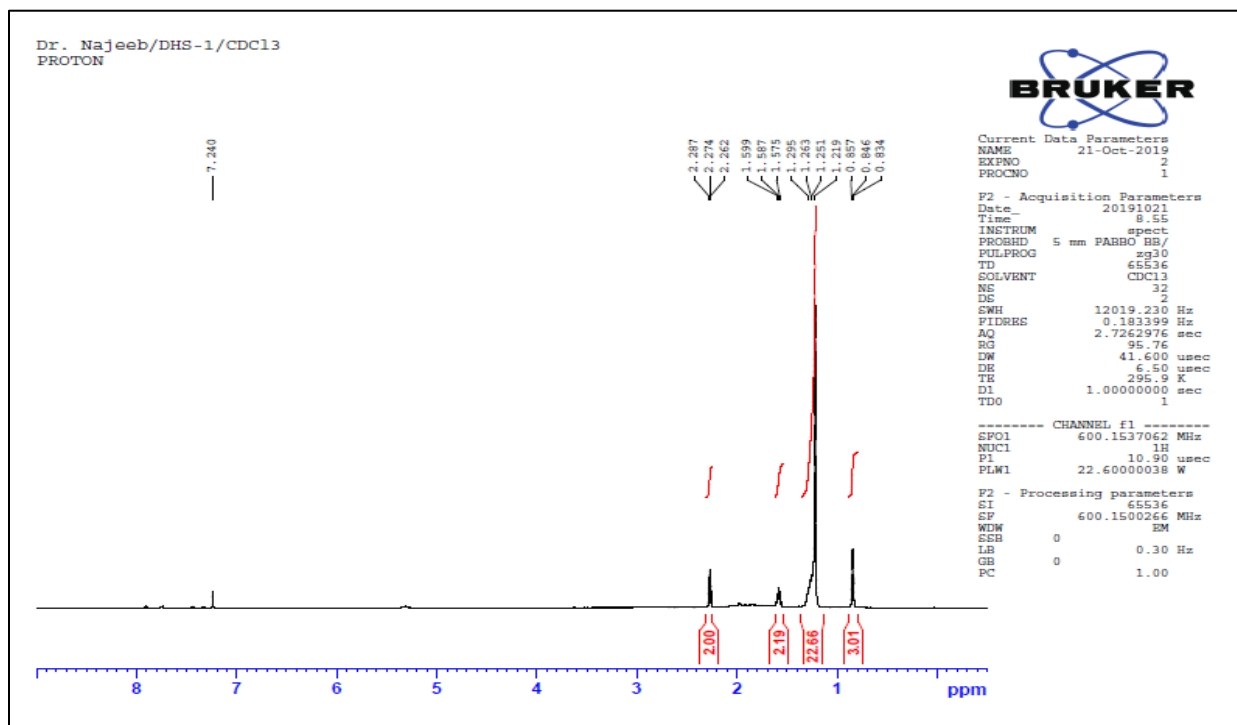<sup>1</sup>H NMR (600 MHz) of compound **10** in CDCl<sub>3</sub>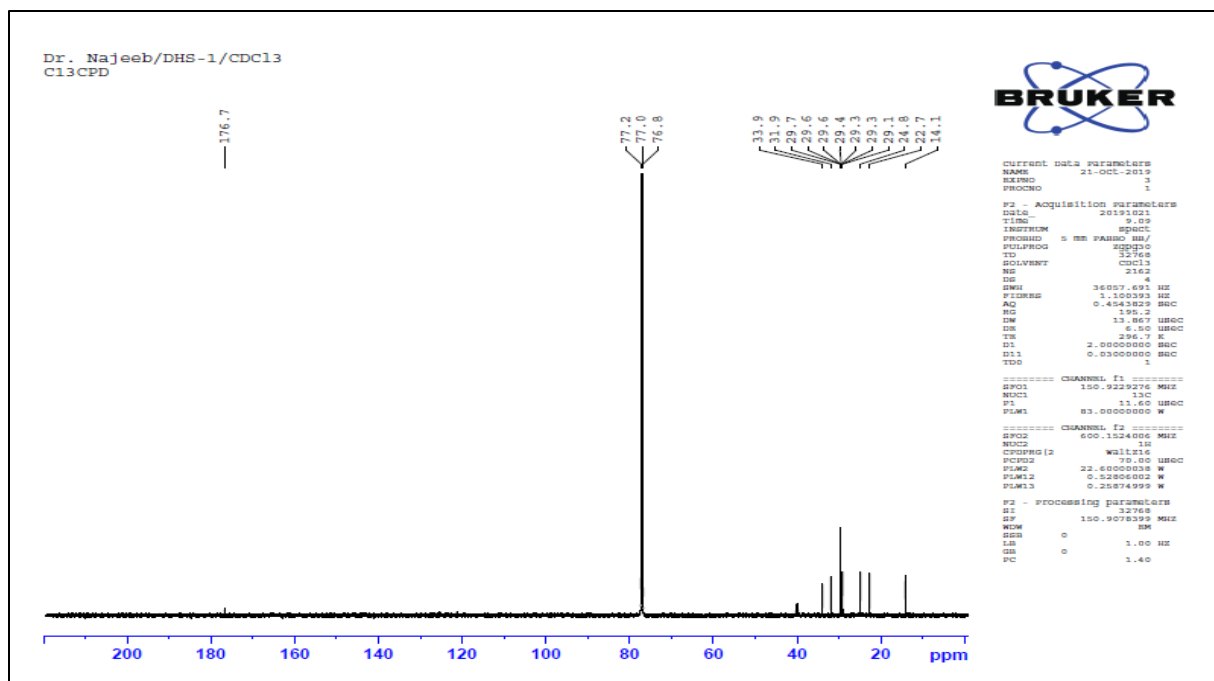<sup>13</sup>C NMR (125 MHz) of compound **10** in CDCl<sub>3</sub>

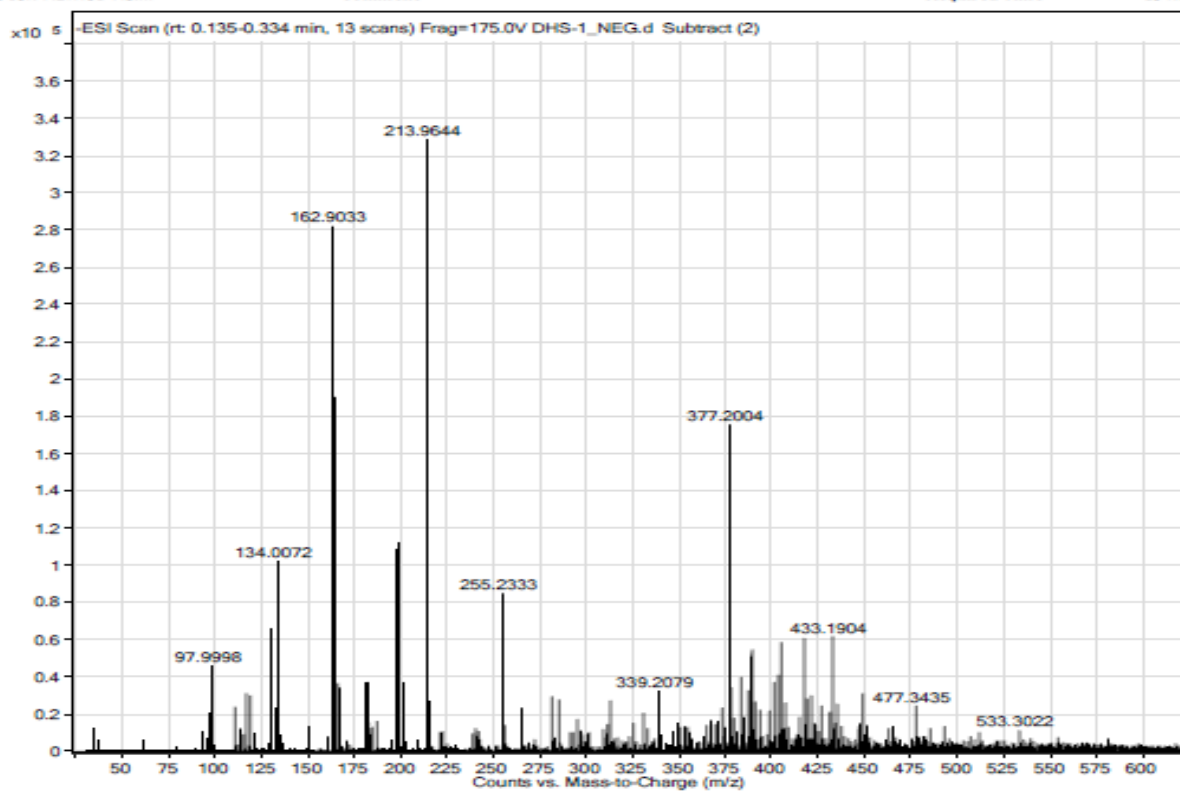

HR-ESI-MS (positive) of compound 10

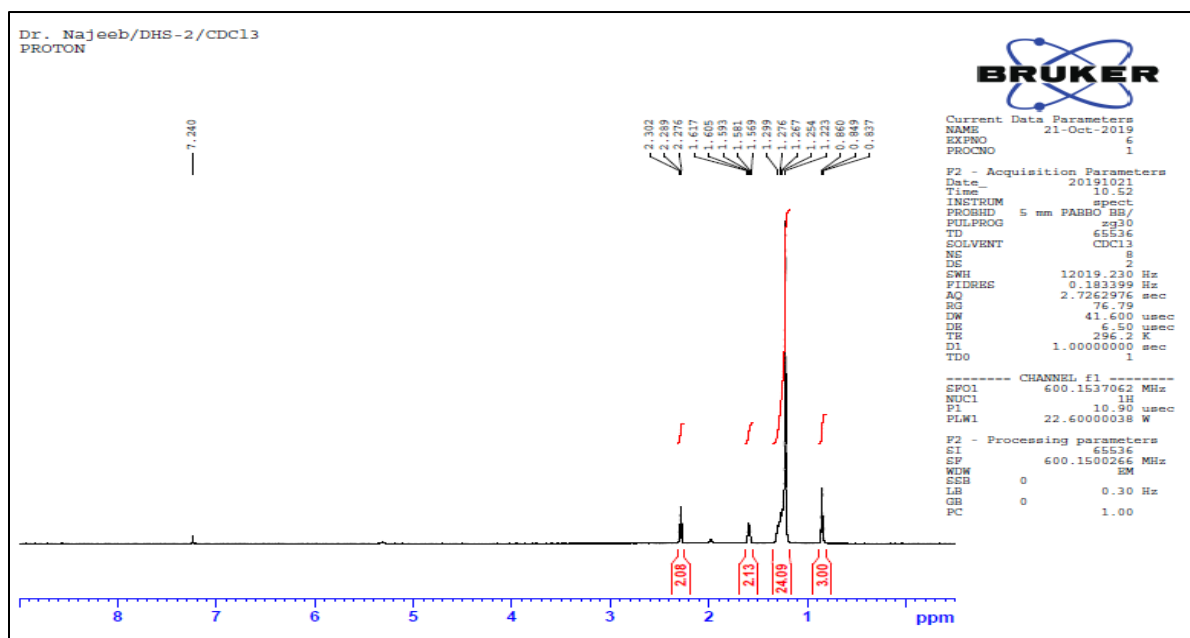<sup>1</sup>H NMR (600 MHz) of compound 11 in CDCl<sub>3</sub>



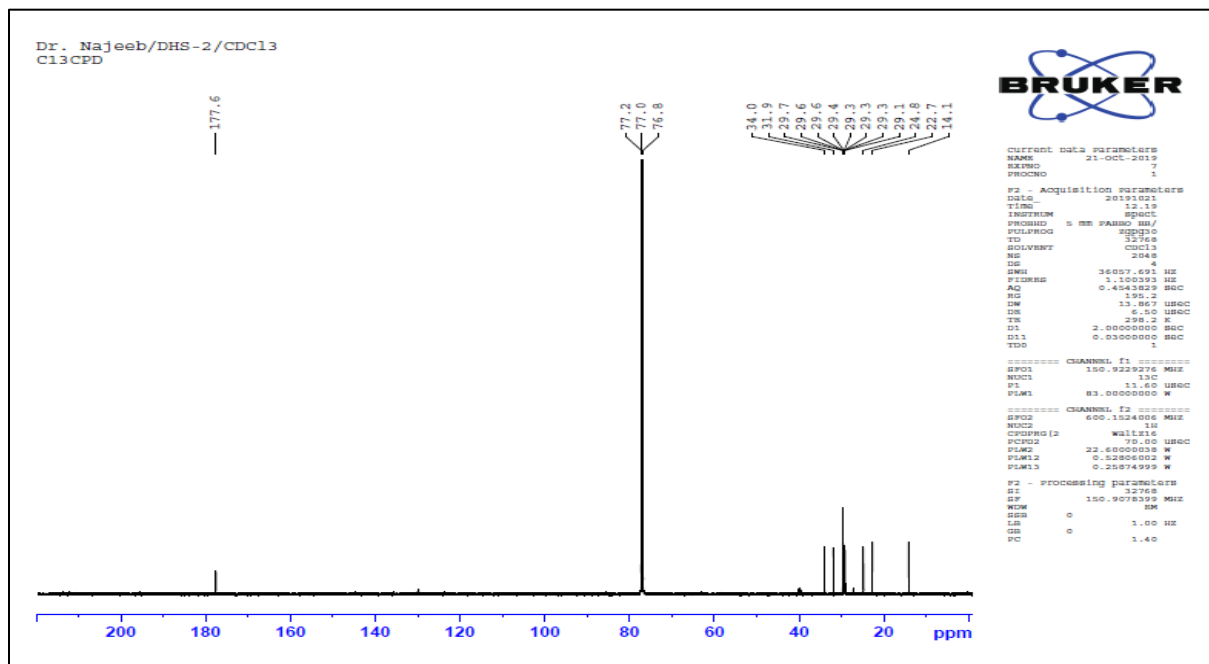<sup>13</sup>C NMR (125 MHz) of compound **11** in CDCl<sub>3</sub>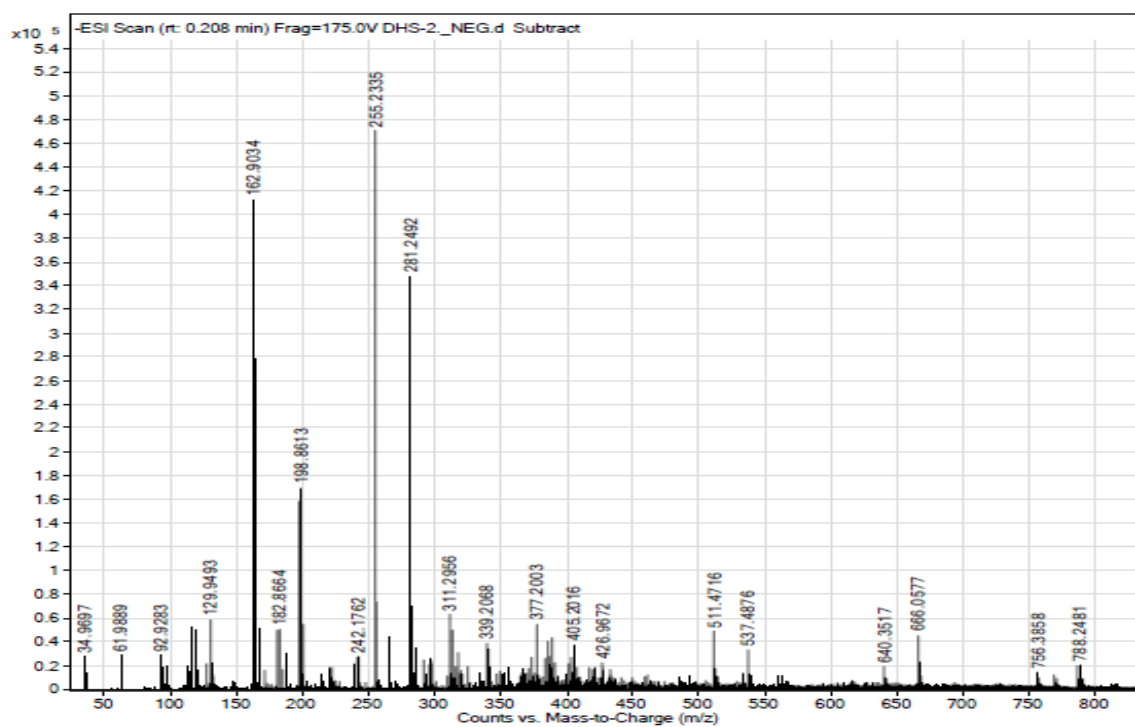HR-ESI-MS (negative) of compound **11**

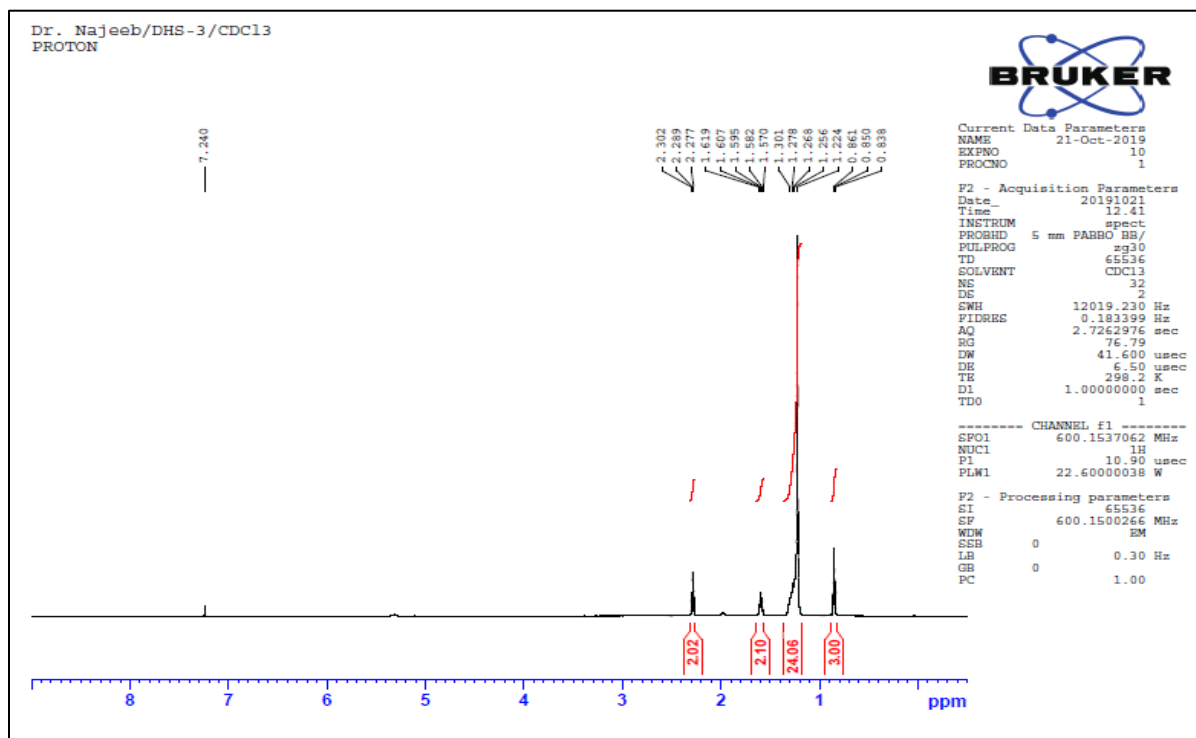<sup>1</sup>H NMR (600 MHz) of compound **12** in CDCl<sub>3</sub>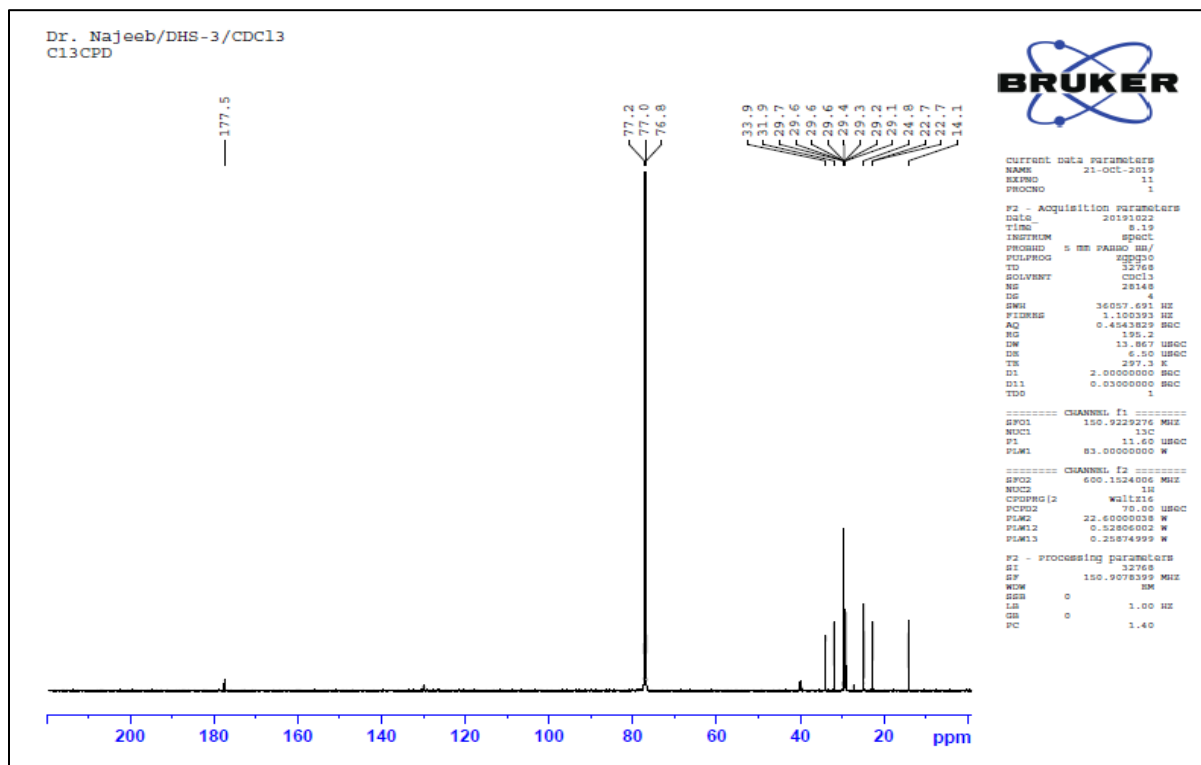

$^{13}\text{C}$  NMR (125 MHz) of compound **12** in  $\text{CDCl}_3$

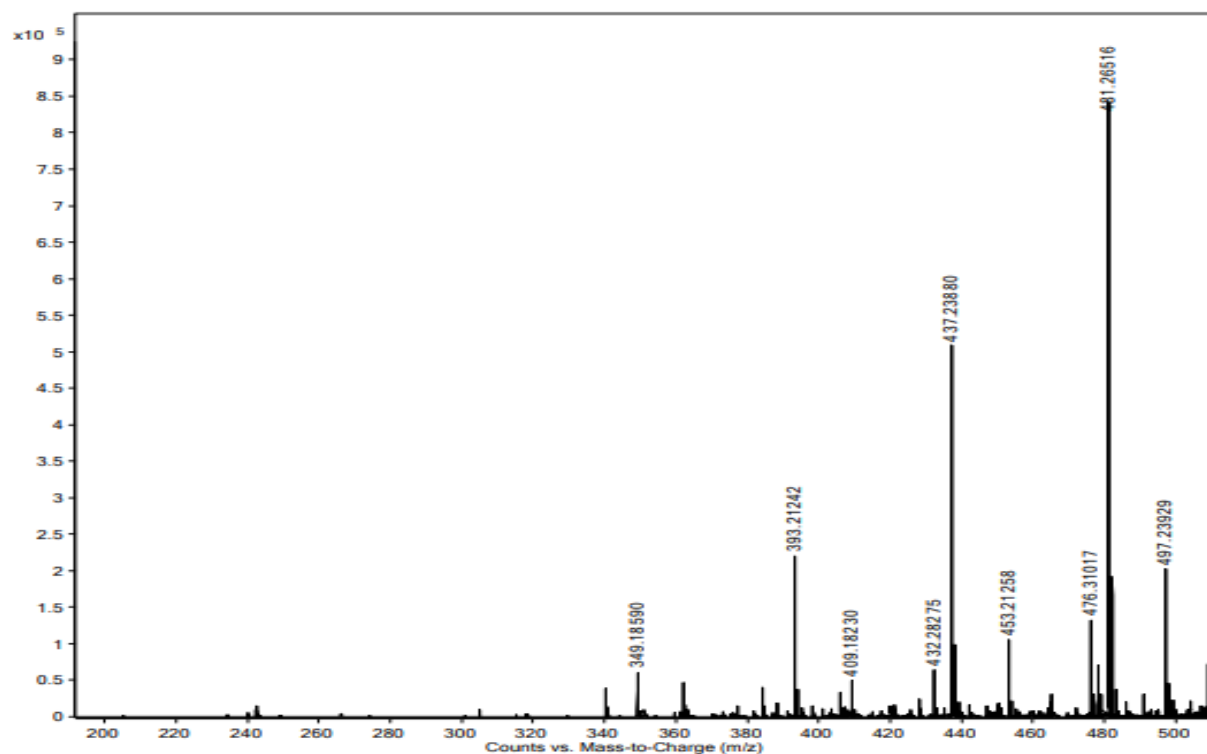

HR-ESI-MS (positive) of compound **12**

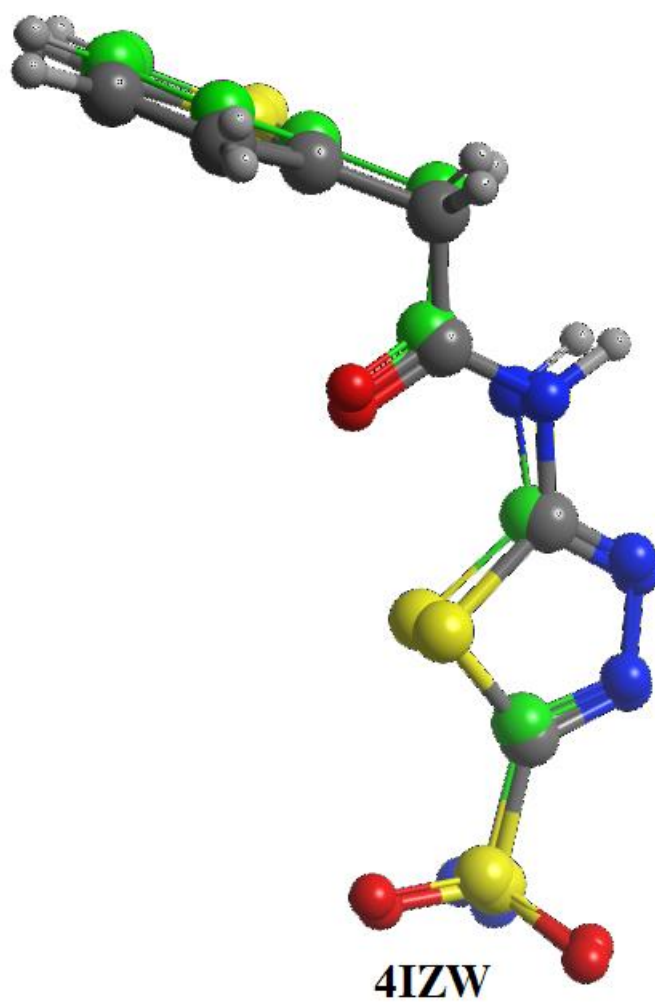

**Figure S2.** Superimposed view of co-crystallized ligand in 4IZW. The docked and the X-ray conformations of compound are shown in gray and green colors, respectively

**Table S1.** The predicted ADMET properties of compounds.

| Physicochemical Properties   |                                               |                                                  |                                                |                                 |                                              |                                                |                                                |                                                  |                                   |                                                |                                                |                                                                            |                                                                            |
|------------------------------|-----------------------------------------------|--------------------------------------------------|------------------------------------------------|---------------------------------|----------------------------------------------|------------------------------------------------|------------------------------------------------|--------------------------------------------------|-----------------------------------|------------------------------------------------|------------------------------------------------|----------------------------------------------------------------------------|----------------------------------------------------------------------------|
| Comp                         | 1                                             | 4                                                | 5                                              | 7                               | 9                                            | 10                                             | 12                                             | 13                                               | 15                                | 18                                             | 19                                             | Referen<br>ce                                                              | Acetazol<br>amide                                                          |
| Formula                      | C <sub>10</sub> H <sub>8</sub> O <sub>3</sub> | C <sub>11</sub> H <sub>11</sub> BrO <sub>4</sub> | C <sub>12</sub> H <sub>11</sub> O <sub>4</sub> | C <sub>17</sub> H <sub>34</sub> | C <sub>8</sub> H <sub>6</sub> O <sub>2</sub> | C <sub>22</sub> H <sub>44</sub> O <sub>2</sub> | C <sub>31</sub> H <sub>62</sub> O <sub>2</sub> | C <sub>11</sub> H <sub>11</sub> BrO <sub>4</sub> | C <sub>30</sub> H <sub>50</sub> O | C <sub>26</sub> H <sub>52</sub> O <sub>2</sub> | C <sub>28</sub> H <sub>54</sub> O <sub>2</sub> | C <sub>8</sub> H <sub>8</sub> N <sub>4</sub> O <sub>3</sub> S <sub>3</sub> | C <sub>4</sub> H <sub>6</sub> N <sub>4</sub> O <sub>3</sub> S <sub>2</sub> |
| MW                           | 176.17<br>g/mol                               | 287.11<br>g/mol                                  | 222.24<br>g/mol                                | 238.45<br>g/mol                 | 134.13<br>g/mol                              | 340.58<br>g/mol                                | 466.82<br>g/mol                                | 287.11<br>g/mol                                  | 426.72<br>g/mol                   | 396.69<br>g/mol                                | 422.73<br>g/mol                                | 304.37<br>g/mol                                                            | 222.25<br>g/mol                                                            |
| NHA                          | 13                                            | 16                                               | 16                                             | 17                              | 10                                           | 24                                             | 33                                             | 16                                               | 31                                | 28                                             | 30                                             | 18                                                                         | 13                                                                         |
| NAHA                         | 6                                             | 6                                                | 6                                              | 0                               | 6                                            | 0                                              | 0                                              | 6                                                | 0                                 | 0                                              | 0                                              | 10                                                                         | 5                                                                          |
| Fraction<br>Csp <sup>3</sup> | 0.00                                          | 0.27                                             | 0.25                                           | 0.88                            | 0.00                                         | 0.95                                           | 0.97                                           | 0.27                                             | 0.87                              | 0.96                                           | 0.89                                           | 0.12                                                                       | 0.25                                                                       |
| NRB                          | 3                                             | 4                                                | 5                                              | 14                              | 2                                            | 20                                             | 29                                             | 5                                                | 5                                 | 24                                             | 25                                             | 5                                                                          | 3                                                                          |
| HBA                          | 3                                             | 4                                                | 4                                              | 0                               | 2                                            | 2                                              | 2                                              | 4                                                | 1                                 | 2                                              | 2                                              | 6                                                                          | 6                                                                          |
| HBD                          | 1                                             | 0                                                | 1                                              | 0                               | 0                                            | 1                                              | 1                                              | 0                                                | 1                                 | 1                                              | 1                                              | 2                                                                          | 2                                                                          |
| MR                           | 48.50                                         | 61.67                                            | 59.86                                          | 83.36                           | 37.22                                        | 109.64                                         | 152.90                                         | 61.51                                            | 137.30                            | 128.87                                         | 138.01                                         | 67.58                                                                      | 45.22                                                                      |
| TPSA                         | 54.37<br>Å <sup>2</sup>                       | 52.60 Å <sup>2</sup>                             | 55.76<br>Å <sup>2</sup>                        | 0.00 Å <sup>2</sup>             | 34.14<br>Å <sup>2</sup>                      | 37.30 Å <sup>2</sup>                           | 37.30 Å <sup>2</sup>                           | 52.60 Å <sup>2</sup>                             | 20.23 Å <sup>2</sup>              | 37.30 Å <sup>2</sup>                           | 37.30 Å <sup>2</sup>                           | 179.90<br>Å <sup>2</sup>                                                   | 151.66 Å <sup>2</sup>                                                      |
| Lipophilicity                |                                               |                                                  |                                                |                                 |                                              |                                                |                                                |                                                  |                                   |                                                |                                                |                                                                            |                                                                            |
| Log <i>P</i> <sub>o/w</sub>  | 1.27                                          | 2.76                                             | 2.09                                           | 4.78                            | 1.03                                         | 5.26                                           | 7.15                                           | 2.85                                             | 5.11                              | 6.23                                           | 6.45                                           | 0.26                                                                       | -0.21                                                                      |
| Water Solubility             |                                               |                                                  |                                                |                                 |                                              |                                                |                                                |                                                  |                                   |                                                |                                                |                                                                            |                                                                            |
| Log <i>S</i> (E<br>SOL)      | -1.89                                         | -3.32                                            | -2.12                                          | -6.37                           | -1.57                                        | -7.16                                          | -10.43                                         | -3.26                                            | -7.98                             | -8.62                                          | -9.04                                          | -2.47                                                                      | -1.14                                                                      |
| Class                        | Very<br>soluble                               | Soluble                                          | Soluble                                        | Poorly<br>soluble               | Very<br>soluble                              | Poorly<br>soluble                              | Insoluble                                      | Soluble                                          | Poorly<br>soluble                 | Poorly<br>soluble                              | Poorly<br>soluble                              | Soluble                                                                    | Very<br>soluble                                                            |
| Pharmacokinetics             |                                               |                                                  |                                                |                                 |                                              |                                                |                                                |                                                  |                                   |                                                |                                                |                                                                            |                                                                            |

|                     |                                       |               |                                       |                                                          |                                       |                                                             |                                                          |               |                                                           |                                                          |                                                          |               |                               |
|---------------------|---------------------------------------|---------------|---------------------------------------|----------------------------------------------------------|---------------------------------------|-------------------------------------------------------------|----------------------------------------------------------|---------------|-----------------------------------------------------------|----------------------------------------------------------|----------------------------------------------------------|---------------|-------------------------------|
| GIA                 | High                                  | High          | High                                  | Low                                                      | High                                  | Low                                                         | Low                                                      | High          | Low                                                       | Low                                                      | Low                                                      | Low           | Low                           |
| BBBP                | Yes                                   | Yes           | Yes                                   | No                                                       | Yes                                   | No                                                          | No                                                       | Yes           | No                                                        | No                                                       | No                                                       | No            | No                            |
| P-gpS               | No                                    | No            | No                                    | No                                                       | No                                    | No                                                          | Yes                                                      | No            | No                                                        | No                                                       | No                                                       | No            | No                            |
| CYP1A2<br>Inh       | No                                    | Yes           | No                                    | Yes                                                      | Yes                                   | Yes                                                         | No                                                       | Yes           | No                                                        | No                                                       | No                                                       | No            | No                            |
| CYP2C1<br>9 Inh     | No                                    | Yes           | No                                    | No                                                       | No                                    | No                                                          | No                                                       | Yes           | No                                                        | No                                                       | No                                                       | No            | No                            |
| CYP2C9<br>Inh       | No                                    | No            | No                                    | No                                                       | No                                    | No                                                          | No                                                       | No            | No                                                        | No                                                       | No                                                       | No            | No                            |
| CYP2D6<br>Inh       | No                                    | No            | No                                    | No                                                       | No                                    | No                                                          | No                                                       | No            | No                                                        | No                                                       | No                                                       | No            | No                            |
| CYP3A4<br>Inh       | No                                    | No            | No                                    | No                                                       | No                                    | No                                                          | No                                                       | No            | No                                                        | No                                                       | No                                                       | No            | No                            |
| Log $K_p$           | -6.45<br>cm/s                         | -6.15<br>cm/s | -6.58<br>cm/s                         | -1.02<br>cm/s                                            | -6.46<br>cm/s                         | -1.01<br>cm/s                                               | 1.68<br>cm/s                                             | -6.14<br>cm/s | -2.34<br>cm/s                                             | 0.18<br>cm/s                                             | 0.39<br>cm/s                                             | -7.41<br>cm/s | -7.84<br>cm/s                 |
| Druglikeness        |                                       |               |                                       |                                                          |                                       |                                                             |                                                          |               |                                                           |                                                          |                                                          |               |                               |
| Lipinski            | Yes                                   | Yes           | Yes                                   | Yes; 1<br>violatio<br>n:<br>MLOGP<br>>4.15               | Yes                                   | Yes; 1<br>violatio<br>n:<br>MLOGP<br>>4.15                  | Yes; 1<br>violatio<br>n:<br>MLOGP<br>>4.15               | Yes           | Yes; 1<br>violatio<br>n:<br>MLOGP<br>>4.15                | Yes; 1<br>violatio<br>n:<br>MLOGP<br>>4.15               | Yes; 1<br>violatio<br>n:<br>MLOGP<br>>4.15               | Yes           | Yes                           |
| BS                  | 0.85                                  | 0.55          | 0.85                                  | 0.55                                                     | 0.55                                  | 0.85                                                        | 0.85                                                     | 0.55          | 0.55                                                      | 0.85                                                     | 0.85                                                     | 0.55          | 0.55                          |
| Medicinal Chemistry |                                       |               |                                       |                                                          |                                       |                                                             |                                                          |               |                                                           |                                                          |                                                          |               |                               |
| PAINS               | 0 alert                               | 0 alert       | 0 alert                               | 0 alert                                                  | 0 alert                               | 0 alert                                                     | 0 alert                                                  | 0 alert       | 0 alert                                                   | 0 alert                                                  | 0 alert                                                  | 0 alert       | 0 alert                       |
| Lead<br>likeness    | No; 1<br>violat<br>ion:<br>MW<<br>250 | Yes           | No; 1<br>violati<br>on:<br>MW<2<br>50 | No; 3<br>violatio<br>ns:<br>MW<25<br>0,<br>Rotors><br>7, | No; 1<br>violati<br>on:<br>MW<<br>250 | No; 2<br>violatio<br>ns:<br>Rotors><br>7,<br>XLOGP<br>3>3.5 | No; 3<br>violatio<br>ns:<br>MW>35<br>0,<br>Rotors><br>7, | Yes           | No; 2<br>violatio<br>ns:<br>MW>35<br>0,<br>XLOGP<br>3>3.5 | No; 3<br>violatio<br>ns:<br>MW>35<br>0,<br>Rotors><br>7, | No; 3<br>violatio<br>ns:<br>MW>35<br>0,<br>Rotors><br>7, | Yes           | No; 1<br>violation:<br>MW<250 |

|    |      | XLOGP<br>3>3.5 |      |      |      |      | XLOGP<br>3>3.5 |      |      | XLOGP<br>3>3.5 |      | XLOGP<br>3>3.5 |      |
|----|------|----------------|------|------|------|------|----------------|------|------|----------------|------|----------------|------|
| SA | 2.03 | 2.13           | 2.31 | 2.71 | 1.00 | 3.00 | 4.11           | 2.02 | 6.27 | 3.49           | 4.26 | 3.00           | 3.00 |

BBBP = Blood Brain Barrier permeant, BS = Bioavailability Score, CYP = cytochrome P450, GIA = Gastrointestinal absorption, HBA = Number of H-bond acceptors, HBD = Number of H-bond donors, Inh = Inhibitor, Log  $P_{o/w}$  = Log P octanol/water, Log  $K_p$  = skin permeation, MR = Molar Refractivity, MW = Molecular weight, NAHA = Number of aromatic heavy atoms, NHA = Num. heavy atoms, NRB = Number of Rotatable bonds, P-gpS = P-glycoprotein substrate, Reference Ligand = (Co-crystallized Ligand), SA = Synthetic accessibility, TPSA = Topological Polar Surface Area
